# Supplementary material for: Synthesis of highly polysubstituted cyclopentadienes through an oxypalladation initiated domino Heck reaction of internal alkynes
Source: Royal Society of Chemistry journal article supplement (doi:10.1039/d5qo01231g), 2025-10-02

Supporting Information

**Synthesis of Highly Polysubstituted Cyclopentadienes through  
Oxypalladation Initiated Domino Heck Reactions of Internal  
Alkynes**

Zhang-Wei Liu,<sup>†</sup> Jie Zhao,<sup>†</sup> Yu Zhao, Yu-Feng Liang, Zhi-Xin Wang,<sup>\*</sup> Gui-Fa Su,<sup>\*</sup> and  
Dong-Liang Mo<sup>\*</sup>

*Key Laboratory for Chemistry and Molecular Engineering of Medicinal Resources  
(Ministry of Education of China), Guangxi Key Laboratory of Chemistry and Molecular  
Engineering of Medicinal Resources, University Engineering Research Center for  
Chemistry of Characteristic Medicinal Resources (Guangxi), School of Chemistry and  
Pharmaceutical Sciences, Guangxi Normal University, 15 Yu Cai Road, Guilin, 541004,  
China. E-mails: 862991993@qq.com; gfysslglx@163.com;  
moeastlight@mailbox.gxnu.edu.cn.*

**Contents**

|    |                                                      |     |
|----|------------------------------------------------------|-----|
| 1. | General experimental information                     | S2  |
| 2. | Synthesis of cyclopentadienes <b>3</b>               | S2  |
| 3. | Synthesis of compounds <b>4</b> and <b>5</b>         | S13 |
| 4. | Gram scale preparation of cyclopentadiene <b>3aa</b> | S15 |
| 5. | NMR spectra for compounds <b>3</b> and <b>4</b>      | S15 |

## 1. General experimental information

$^1\text{H}$  NMR and  $^{13}\text{C}\{^1\text{H}\}$  NMR spectra were recorded at ambient temperature using 400 or 500 MHz spectrometers. The data are reported as follows: chemical shift in ppm from internal tetramethylsilane on the  $\delta$  scale, multiplicity (br = broad, s = singlet, d = doublet, t = triplet, q = quartet, m = multiplet), coupling constants (Hz), and integration. Enantiomeric excesses (ee) were determined by chiral high-performance liquid chromatography (chiral HPLC). The chiral columns used for the determination of Enantiomeric ratios by chiral HPLC were Chiralpak columns. Optical rotation values were measured with instruments operating at  $\lambda = 589$  nm, corresponding to the sodium D line at the temperatures indicated. High resolution mass spectra were acquired on an LTQ FT spectrometer, and were obtained by peak matching. Melting points are reported uncorrected. Analytical thin layer chromatography was performed on 0.25 mm extra hard silica gel plates with UV254 fluorescent indicator. Chromatography was performed using with 300-400 mesh silica gel ( $\text{SiO}_2$ ). Unless otherwise noted, all reagents and solvents were obtained from commercial sources and, where appropriate, purified prior to use. alkynes **1a-1h**, carboxylic acids **2a-2p**, **2q-2s** and ligands **L1-L11** were purchased from Sigma-Adrich.

## 2. Synthesis of cyclopentadienes **3**

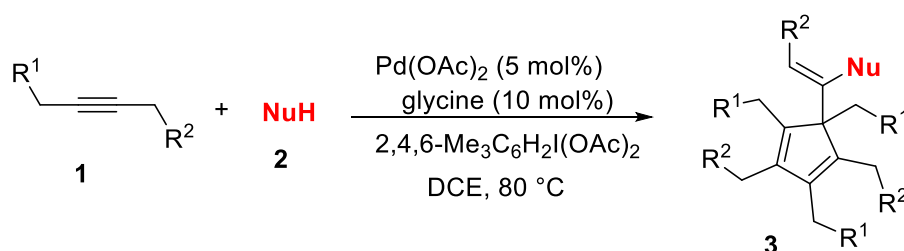

**General procedure A:** In a 10 mL reaction flask was charged with  $\text{Pd}(\text{OAc})_2$  (3.4 mg, 0.015 mmol, 5 mol%), glycine **L4** (2.3 mg, 0.03 mmol, 10 mol%), and DCE (1.0 mL). The mixture was stirred at room temperature for 30 min under  $\text{N}_2$ . Then, alkynes **1** (0.9 mmol), NuH **2** (1.5 mmol, 5.0 equiv.), 2,4,6- $\text{Me}_3\text{C}_6\text{H}_2\text{I}(\text{OAc})_2$  (218.4 mg, 0.6 mmol, 2.0 equiv.) and DCE (2.0 mL) were added. The reaction vessel was once again sealed with a Teflon cap. The reaction mixture was stirred vigorously at 80 °C in an oil bath

for 16-24 h until alkyne **1** was consumed completely (monitored by TLC). At this time, the solvent was removed under reduced pressure and the crude product was purified by flash column chromatography (1/20 to 1/5, ethyl acetate/petroleum ether) to afford cyclopentadienes **3**.

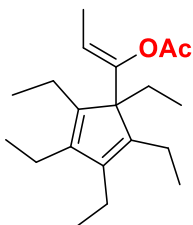

**3aa**

**(Z)-1-(1,2,3,4,5-pentaethylcyclopenta-2,4-dien-1-yl)prop-1-en-1-yl acetate (3aa).**

Light yellow liquid, 0.065 g, 71% yield.  $^1\text{H}$  NMR (400 MHz,  $\text{CDCl}_3$ ):  $\delta$  5.31 (q,  $J$  = 5.2, 1H), 2.26–2.22 (m, 4H), 2.14–2.02 (m, 4H), 1.88 (s, 3H), 1.74 (q,  $J$  = 6.0 Hz, 2H), 1.47 (d,  $J$  = 5.6 Hz, 3H), 1.04–0.99 (m, 12H), 0.46 (t,  $J$  = 5.6 Hz, 3H);  $^{13}\text{C}\{^1\text{H}\}$  NMR (125 MHz,  $\text{CDCl}_3$ ):  $\delta$  167.0, 150.1, 143.9, 141.4, 111.0, 65.5, 22.1, 20.3, 18.8, 18.7, 14.9, 13.7, 11.6, 7.3; HRMS (ESI)  $m/z$  calcd for  $\text{C}_{20}\text{H}_{33}\text{O}_2$   $[\text{M}+\text{H}]^+$  305.2475, found 305.2475.

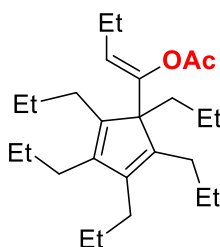

**3ba**

**(Z)-1-(1,2,3,4,5-pentapropylcyclopenta-2,4-dien-1-yl)but-1-en-1-yl acetate (3ba).**

Light yellow liquid, 0.087g, 75% yield.  $^1\text{H}$  NMR (400 MHz,  $\text{CDCl}_3$ ):  $\delta$  5.19-5.16 (t,  $J$  = 7.2 Hz, 1H), 2.17–2.13 (m, 4H), 2.10–2.02 (m, 2H), 1.98–1.90 (m, 2H), 1.88–1.82 (m, 2H), 1.86 (s, 3H), 1.63–1.59 (m, 2H), 1.43–1.33 (m, 8H), 0.98–0.90 (m, 15H), 0.80–0.74 (m, 2H), 0.78 (d,  $J$  = 1.6 Hz, 3H);  $^{13}\text{C}\{^1\text{H}\}$  NMR (125 MHz,  $\text{CDCl}_3$ ):  $\delta$  167.2, 148.5, 142.5, 141.3, 118.3, 64.8, 32.2, 28.6, 28.4, 23.5, 22.5, 20.5, 19.8, 15.8, 15.1, 14.6, 14.3, 13.6; HRMS (ESI)  $m/z$  calcd for  $\text{C}_{26}\text{H}_{45}\text{O}_2$   $[\text{M}+\text{H}]^+$  389.3414, found 389.3417.

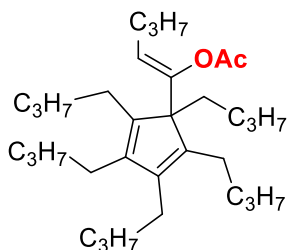

**3ca**

**(Z)-1-(1,2,3,4,5-pentabutylcyclopenta-2,4-dien-1-yl)pent-1-en-1-yl acetate (3ca).**

Light yellow liquid, 0.086g, 61% yield.  $^1\text{H}$  NMR (400 MHz,  $\text{CDCl}_3$ ):  $\delta$  5.20 (t,  $J = 6.8$  Hz, 1H), 2.18–2.15 (m, 4H), 2.10–2.04 (m, 2H), 1.97–1.92 (m, 2H), 1.86 (s, 3H), 1.64–1.58 (m, 5H), 1.40–1.33 (m, 19H), 0.94–0.88 (m, 15H), 0.84 (t,  $J = 7.2$  Hz, 3H), 0.75–0.73 (m, 2H);  $^{13}\text{C}\{^1\text{H}\}$  NMR (100 MHz,  $\text{CDCl}_3$ ):  $\delta$  167.2, 149.2, 142.5, 141.0, 116.6, 64.8, 32.4, 31.4, 28.4, 26.0, 25.9, 24.6, 23.6, 23.1, 23.0, 22.2, 20.5, 14.1, 14.0, 13.9, 13.8; HRMS (ESI)  $m/z$  calcd for  $\text{C}_{32}\text{H}_{57}\text{O}_2$   $[\text{M}+\text{H}]^+$  473.4353, found 473.4360.

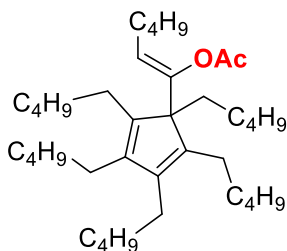

**3da**

**(Z)-1-(1,2,3,4,5-pentapentylcyclopenta-2,4-dien-1-yl)hex-1-en-1-yl acetate (3da).**

Light yellow liquid, 0.097 g, 58% yield.  $^1\text{H}$  NMR (400 MHz,  $\text{CDCl}_3$ ):  $\delta$  5.16 (t,  $J = 7.2$  Hz, 1H), 2.17–2.14 (m, 4H), 2.10–2.02 (m, 2H), 1.98–1.91 (m, 2H), 1.86 (s, 3H), 1.63–1.59 (m, 4H), 1.38–1.25 (m, 31H), 0.91–0.87 (m, 16H), 0.84 (t,  $J = 7.2$  Hz, 3H), 0.79–0.71 (m, 2H);  $^{13}\text{C}\{^1\text{H}\}$  NMR (100 MHz,  $\text{CDCl}_3$ ):  $\delta$  167.1, 149.1, 142.5, 141.2, 116.7, 64.9, 32.7, 32.3, 31.2, 29.9, 28.8, 26.2, 26.1, 26.0, 22.6, 22.5, 22.4, 22.1, 20.5, 14.1, 14.0, 13.9; HRMS (ESI)  $m/z$  calcd for  $\text{C}_{38}\text{H}_{69}\text{O}_2$   $[\text{M}+\text{H}]^+$  557.5292, found 557.5309.

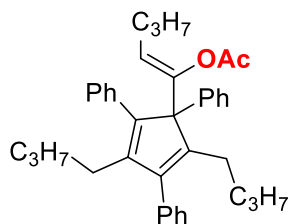

**3ea**

**(Z)-1-(2,4-dibutyl-1,3,5-triphenylcyclopenta-2,4-dien-1-yl)pent-1-en-1-yl acetate**

**(3ea)** A yellow liquid, 0.093 g, 56% yield;  $^1\text{H}$  NMR (500 MHz,  $\text{CDCl}_3$ ):  $\delta$  7.38-7.34 (m, 5H), 7.32-7.28 (m, 5H), 7.21-7.20 (m, 3H), 7.07-7.04 (m, 3H), 5.32 (t,  $J = 7.0$  Hz, 1H), 2.39-2.31 (m, 3H), 2.07-2.04 (m, 5H), 1.49-1.44 (m, 3H), 0.94-0.90 (m, 7H), 0.85-0.80 (m, 3H), 0.60 (t,  $J = 7.5$  Hz, 3H), 0.53 (t,  $J = 7.0$  Hz, 3H);  $^{13}\text{C}$  NMR (125 MHz,  $\text{CDCl}_3$ ):  $\delta$  167.7, 146.5, 146.2, 145.1, 144.9, 144.3, 137.7, 136.9, 136.0, 129.9, 129.8, 129.5, 128.4, 127.9, 127.4, 126.9, 126.7, 126.1, 119.5, 66.6, 30.5, 29.9, 29.2, 26.1, 24.4, 22.8, 22.3, 22.1, 20.9, 14.2, 14.0, 13.6; HRMS (ESI)  $m/z$  calcd for  $\text{C}_{38}\text{H}_{44}\text{NaO}_2$  [ $\text{M} + \text{Na}$ ] $^+$ : 555.3234, found 555.3233.

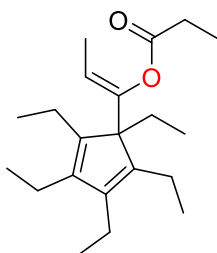

**3ab**

**(Z)-1-(1,2,3,4,5-pentaethylcyclopenta-2,4-dien-1-yl)prop-1-en-1-yl butyrate (3ab).**

Light yellow liquid, 0.096 g, 73% yield.  $^1\text{H}$  NMR (400 MHz,  $\text{CDCl}_3$ ):  $\delta$  5.32 (q,  $J = 6.8$  Hz, 1H), 2.26-1.99 (m, 10H), 1.75 (q,  $J = 7.2$  Hz, 2H), 1.46 (d,  $J = 6.8$  Hz, 3H), 1.05-0.99 (m, 15H), 0.45 (t,  $J = 7.2$  Hz, 3H);  $^{13}\text{C}\{^1\text{H}\}$  NMR (100 MHz,  $\text{CDCl}_3$ ):  $\delta$  170.4, 150.0, 141.4, 110.8, 65.4, 27.3, 22.1, 18.8, 14.9, 13.7, 11.6, 9.2, 7.3; HRMS (ESI)  $m/z$  calcd for  $\text{C}_{21}\text{H}_{34}\text{O}_2$  [ $\text{M} + \text{Na}$ ] $^+$  341.2451, found 341.2451.

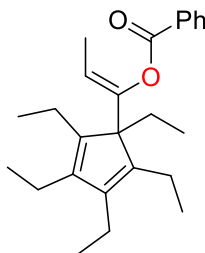

**3ac**

**(Z)-1-(1,2,3,4,5-pentaethylcyclopenta-2,4-dien-1-yl)prop-1-en-1-yl benzoate (3ac).**

Light yellow liquid, 0.075 g, 69% yield.  $^1\text{H}$  NMR (400 MHz,  $\text{CDCl}_3$ ):  $\delta$  7.90 (d,  $J = 7.6$  Hz, 2H), 7.52 (t,  $J = 7.6$  Hz, 1H), 7.38 (t,  $J = 7.6$  Hz, 2H), 5.45 (q,  $J = 6.8$  Hz, 1H), 2.27–2.04 (m, 8H), 1.82 (q,  $J = 7.2$ , 2H), 1.54 (d,  $J = 6.8$  Hz, 3H), 1.07 (t,  $J = 7.6$  Hz, 6H), 0.84 (t,  $J = 7.6$  Hz, 6H), 0.48 (t,  $J = 7.2$  Hz, 3H);  $^{13}\text{C}$   $\{^1\text{H}\}$  NMR (100 MHz,  $\text{CDCl}_3$ ):  $\delta$  162.7, 150.0, 144.2, 141.3, 132.6, 130.1, 129.9, 128.0, 111.5, 65.5, 22.2, 18.8, 14.6, 13.8, 11.8, 7.3; HRMS (ESI)  $m/z$  calcd for  $\text{C}_{25}\text{H}_{35}\text{O}_2$   $[\text{M}+\text{H}]^+$  367.2632, found 367.2629.

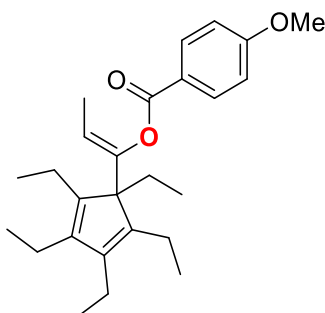

**3ad**

**(Z)-1-(1,2,3,4,5-pentaethylcyclopenta-2,4-dien-1-yl)prop-1-en-1-yl** **4-**

**methoxybenzoate (3ad).** Light yellow liquid, 0.072 g, 64% yield.  $^1\text{H}$  NMR (400 MHz,  $\text{CDCl}_3$ ):  $\delta$  7.85 (d,  $J = 8.8$  Hz, 2H), 6.85 (d,  $J = 8.4$  Hz, 2H), 5.42 (q,  $J = 6.8$  Hz, 1H), 3.84 (s, 3H), 2.26–2.04 (m, 8H), 1.81 (q,  $J = 7.2$  Hz, 2H), 1.53 (d,  $J = 6.8$  Hz, 3H), 1.09 (t,  $J = 7.6$  Hz, 6H), 0.86 (t,  $J = 7.2$  Hz, 6H), 0.47 (t,  $J = 7.6$  Hz, 3H);  $^{13}\text{C}$   $\{^1\text{H}\}$  NMR (125 MHz,  $\text{CDCl}_3$ ):  $\delta$  163.0, 162.4, 150.0, 144.1, 141.4, 131.9, 122.6, 113.2, 111.3, 65.6, 55.4, 22.1, 18.8, 18.7, 14.7, 13.8, 11.8, 7.3; HRMS (ESI)  $m/z$  calcd for  $\text{C}_{26}\text{H}_{37}\text{O}_3$   $[\text{M}+\text{H}]^+$  397.2737, found 397.2737.

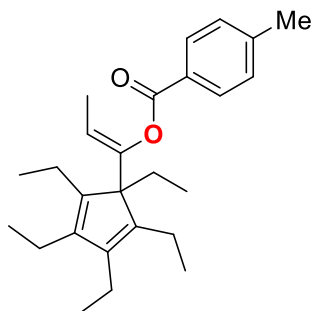

**3ae**

**(Z)-1-(1,2,3,4,5-pentaethylcyclopenta-2,4-dien-1-yl)prop-1-en-1-yl 4-methylbenzoate (3ae).** Light yellow liquid, 0.071 g, 62% yield.  $^1\text{H}$  NMR (400 MHz,  $\text{CDCl}_3$ ):  $\delta$  7.79 (d,  $J = 8.0$  Hz, 2H), 7.17 (d,  $J = 8.0$  Hz, 2H), 5.43 (d,  $J = 6.8$  Hz, 1H), 2.38 (s, 3H), 2.27–2.04 (m, 8H), 1.81 (q,  $J = 6.0$  Hz, 2H), 1.52 (d,  $J = 6.8$  Hz, 3H), 1.09 (t,  $J = 7.6$  Hz, 6H), 0.86 (t,  $J = 7.6$  Hz, 6H), 0.47 (t,  $J = 7.2$  Hz, 3H);  $^{13}\text{C}\{^1\text{H}\}$  NMR (125 MHz,  $\text{CDCl}_3$ ):  $\delta$  162.8, 150.0, 144.1, 143.2, 141.3, 129.9, 128.7, 127.4, 111.3, 65.6, 22.1, 21.6, 18.8, 18.7, 14.7, 13.8, 11.8, 7.3; HRMS (ESI)  $m/z$  calcd for  $\text{C}_{26}\text{H}_{37}\text{O}_2$   $[\text{M}+\text{H}]^+$  381.2788, found 381.2791.

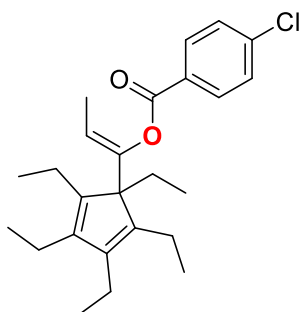

**3af**

**(Z)-1-(1,2,3,4,5-pentaethylcyclopenta-2,4-dien-1-yl)prop-1-en-1-yl 4-chlorobenzoate (3af)** A yellow liquid, 0.085 g, 71% yield;  $^1\text{H}$  NMR (500 MHz,  $\text{CDCl}_3$ ):  $\delta$  7.82 (d,  $J = 8.5$  Hz, 2H), 7.34 (d,  $J = 8.5$  Hz, 2H), 5.45 (d, 6.5 Hz, 1H), 2.23–2.07 (m, 8H), 1.81 (q,  $J = 7.0$  Hz, 2H), 1.52 (d,  $J = 6.5$  Hz, 3H), 1.06 (t,  $J = 7.5$  Hz, 6H), 0.82 (t,  $J = 7.0$  Hz, 6H), 0.46 (t,  $J = 7.0$  Hz, 3H);  $^{13}\text{C}$  NMR (125 MHz,  $\text{CDCl}_3$ ):  $\delta$  161.9, 150.1, 144.4, 141.4, 139.2, 131.4, 128.8, 128.6, 111.8, 65.7, 22.3, 19.0, 14.9, 14.0, 12.0, 7.4; HRMS (ESI)  $m/z$  calcd for  $\text{C}_{25}\text{H}_{33}\text{ClNaO}_2$   $[\text{M} + \text{Na}]^+$ : 423.2061, found 423.2058.

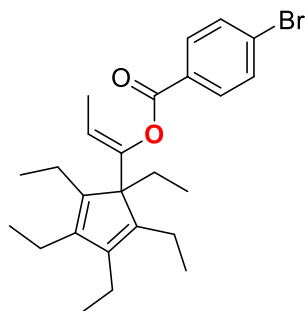

**3ag**

**(Z)-1-(1,2,3,4,5-pentaethylcyclopenta-2,4-dien-1-yl)prop-1-en-1-yl 4-bromobenzoate (3ag)** A yellow liquid, 0.081 g, 61% yield;  $^1\text{H}$  NMR (500 MHz,  $\text{CDCl}_3$ ):  $\delta$  7.75 (d,  $J$  = 8.5 Hz, 2H), 7.51 (d,  $J$  = 8.5 Hz, 2H), 5.45 (d,  $J$  = 7.0 Hz, 1H), 2.24-2.15 (m, 4H), 2.13-2.03 (m, 4H), 1.81 (q,  $J$  = 7.5 Hz, 2H), 1.52 (d,  $J$  = 6.5 Hz, 3H), 1.06 (t,  $J$  = 8.0 Hz, 6H), 0.83 (t,  $J$  = 7.5 Hz, 6H), 0.46 (t,  $J$  = 6.5 Hz, 3H);  $^{13}\text{C}$  NMR (125 MHz,  $\text{CDCl}_3$ ):  $\delta$  162.1, 150.1, 144.5, 141.4, 131.6, 129.2, 127.9, 111.8, 65.7, 22.3, 19.0, 18.9, 14.9, 14.0, 12.0, 7.4; HRMS (ESI)  $m/z$  calcd for  $\text{C}_{25}\text{H}_{33}\text{BrNaO}_2$   $[\text{M} + \text{Na}]^+$ : 467.1556, found 467.1546.

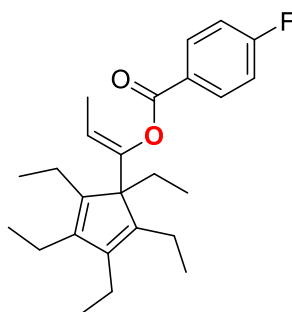

**3ah**

**(Z)-1-(1,2,3,4,5-pentaethylcyclopenta-2,4-dien-1-yl)prop-1-en-1-yl 4-fluorobenzoate (3ah)** A yellow liquid, 0.076 g, 66% yield;  $^1\text{H}$  NMR (500 MHz,  $\text{CDCl}_3$ ):  $\delta$  7.91-7.88 (m, 2H), 7.03 (t,  $J$  = 8.5 Hz, 2H), 5.45 (q,  $J$  = 7.0 Hz, 1H), 2.25-2.15 (m, 4H), 2.13-2.04 (m, 4H), 1.81 (q,  $J$  = 7.5 Hz, 2H), 1.53 (d,  $J$  = 7.0 Hz, 3H), 1.06 (t,  $J$  = 7.5 Hz, 6H), 0.82 (t,  $J$  = 7.5 Hz, 6H), 0.46 (t,  $J$  = 7.0 Hz, 3H);  $^{13}\text{C}$  NMR (125 MHz,  $\text{CDCl}_3$ ):  $\delta$  166.7 (d,  $J$  = 252.0 Hz), 161.7, 150.0, 144.3, 141.4, 132.5 (d,  $J$  = 9.1 Hz), 126.5 (d,  $J$  = 2.9 Hz), 115.3 (d,  $J$  = 21.6 Hz), 111.7, 65.6, 22.2, 18.9, 18.8, 14.7, 13.9, 11.8, 7.3;  $^{19}\text{F}$  NMR (470 MHz,  $\text{CDCl}_3$ ):  $\delta$  -106.2; HRMS (ESI)  $m/z$  calcd for  $\text{C}_{25}\text{H}_{34}\text{FO}_2$   $[\text{M} + \text{H}]^+$ : 385.2537, found 385.2530.



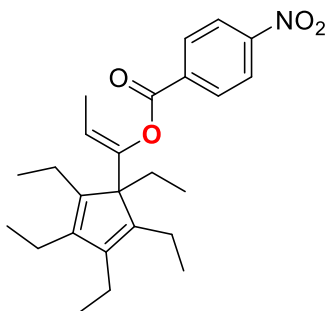

**3ai**

**(Z)-1-(1,2,3,4,5-pentaethylcyclopenta-2,4-dien-1-yl)prop-1-en-1-yl 4-nitrobenzoate (3ai)** A yellow liquid, 0.089 g, 72% yield;  $^1\text{H}$  NMR (500 MHz,  $\text{CDCl}_3$ ):  $\delta$  8.23 (d,  $J = 8.5$  Hz, 2H), 8.05 (d,  $J = 8.5$  Hz, 2H), 5.50 (q,  $J = 6.5$  Hz, 1H), 2.23-2.19 (m, 2H), 2.16-2.11 (m, 4H), 2.10-2.05 (m, 2H), 1.82 (q,  $J = 7.0$  Hz, 2H), 1.54 (d,  $J = 7.0$  Hz, 3H), 1.07 (t,  $J = 7.5$  Hz, 6H), 0.81 (t,  $J = 7.5$  Hz, 6H), 0.47 (t,  $J = 7.0$  Hz, 3H);  $^{13}\text{C}$  NMR (125 MHz,  $\text{CDCl}_3$ ):  $\delta$  160.9, 150.5, 150.2, 144.6, 141.4, 135.8, 131.1, 123.4, 112.2, 65.7, 22.4, 18.9, 18.9, 14.9, 14.0, 12.0, 7.4; HRMS (ESI)  $m/z$  calcd for  $\text{C}_{25}\text{H}_{34}\text{NO}_4$   $[\text{M} + \text{H}]^+$ : 412.2482, found 412.2478.

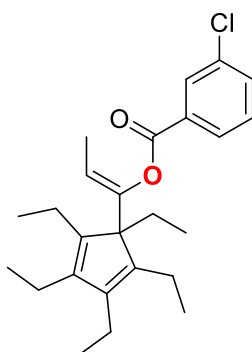

**3aj**

**(Z)-1-(1,2,3,4,5-pentaethylcyclopenta-2,4-dien-1-yl)prop-1-en-1-yl 3-chlorobenzoate (3aj)**. Light yellow liquid, 0.086 g, 72% yield.  $^1\text{H}$  NMR (400 MHz,  $\text{CDCl}_3$ ):  $\delta$  7.85 (s, 1H), 7.78 (d,  $J = 7.6$  Hz, 1H), 7.48 (d,  $J = 7.6$  Hz, 1H), 7.33-7.29 (m, 1H), 5.47 (q,  $J = 6.8$  Hz, 1H), 2.23-2.05 (m, 8H), 1.82-1.76 (m, 2H), 1.54 (d,  $J = 6.8$  Hz, 3H), 1.09 (t,  $J = 7.6$  Hz, 6H), 0.85 (t,  $J = 7.2$  Hz, 6H), 0.48 (t,  $J = 7.2$  Hz, 3H);  $^{13}\text{C}\{^1\text{H}\}$  NMR (100 MHz,  $\text{CDCl}_3$ ):  $\delta$  161.4, 149.9, 144.4, 141.2, 134.2, 132.7, 131.9, 130.0, 129.4, 128.0, 111.8, 65.5, 22.2, 18.8, 18.7, 14.7, 13.8, 11.8, 7.3; HRMS (ESI)  $m/z$  calcd for  $\text{C}_{25}\text{H}_{34}\text{ClO}_2$   $[\text{M} + \text{H}]^+$ : 401.2242, found 401.2255.

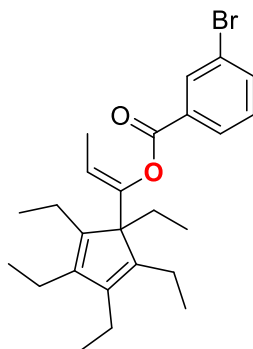

**3ak**

**(Z)-1-(1,2,3,4,5-pentaethylcyclopenta-2,4-dien-1-yl)prop-1-en-1-yl 3-bromobenzoate (3ak)** A yellow liquid, 0.097 g, 73% yield;  $^1\text{H}$  NMR (500 MHz,  $\text{CDCl}_3$ ):  $\delta$  8.0 (s, 1H), 7.83 (d,  $J = 8.0$  Hz, 1H), 7.63 (d,  $J = 8.0$  Hz, 1H), 7.24 (d,  $J = 8.0$  Hz, 1H), 5.46 (q,  $J = 6.5$  Hz, 1H), 2.23-2.15 (m, 6H), 2.11-2.05 (m, 2H), 1.81 (q,  $J = 7.5$  Hz, 2H), 1.53 (d,  $J = 7.0$  Hz, 3H), 1.07 (t,  $J = 7.5$  Hz, 6H), 0.83 (t,  $J = 7.5$  Hz, 6H), 0.46 (t,  $J = 7.0$  Hz, 3H);  $^{13}\text{C}$  NMR (125 MHz,  $\text{CDCl}_3$ ):  $\delta$  161.4, 150.1, 144.6, 141.4, 135.8, 133.1, 132.2, 129.8, 128.6, 122.3, 112.0, 65.7, 22.3, 18.9, 14.9, 13.9, 12.0, 7.4; HRMS (ESI)  $m/z$  calcd for  $\text{C}_{25}\text{H}_{34}\text{BrO}_2$   $[\text{M} + \text{H}]^+$ : 445.1737, found 445.1722.

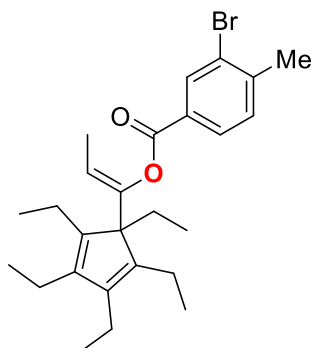

**3al**

**(Z)-1-(1,2,3,4,5-pentaethylcyclopenta-2,4-dien-1-yl)prop-1-en-1-yl 3-bromo-4-methylbenzoate (3al)**. Light yellow liquid, 0.078 g, 57% yield.  $^1\text{H}$  NMR (400 MHz,  $\text{CDCl}_3$ ):  $\delta$  8.02 (s, 1H), 7.73 (d,  $J = 7.6$  Hz, 1H), 7.23 (d,  $J = 8.0$  Hz, 1H), 5.45 (q,  $J = 6.8$  Hz, 1H), 2.42 (s, 3H), 2.25–2.03 (m, 8H), 1.82 (q,  $J = 7.2$  Hz, 2H), 1.53 (d,  $J = 6.8$  Hz, 3H), 1.09 (t,  $J = 7.6$  Hz, 6H), 0.86 (t,  $J = 7.2$  Hz, 6H), 0.48 (t,  $J = 7.2$  Hz, 3H);  $^{13}\text{C}\{^1\text{H}\}$  NMR (125 MHz,  $\text{CDCl}_3$ ):  $\delta$  161.4, 149.9, 144.4, 143.0, 141.2, 133.8, 130.4, 129.5, 128.7, 124.4, 111.7, 65.5, 23.2, 22.1, 18.8, 14.7, 13.8, 11.8, 7.3; HRMS (ESI)  $m/z$  calcd for  $\text{C}_{26}\text{H}_{36}\text{BrO}_2$   $[\text{M} + \text{H}]^+$  459.1893, found 459.1872.

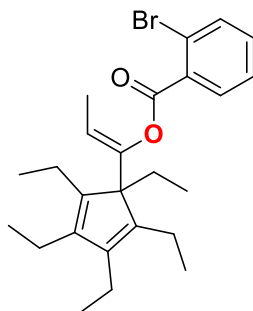

**3am**

**(Z)-1-(1,2,3,4,5-pentaethylcyclopenta-2,4-dien-1-yl)prop-1-en-1-yl 2-bromobenzoate (3am).** Light yellow liquid, 0.071 g, 52% yield.  $^1\text{H}$  NMR (400 MHz,  $\text{CDCl}_3$ ):  $\delta$  7.62 (d,  $J = 7.8$  Hz, 2H), 7.29–7.25 (m, 2H), 5.48 (q,  $J = 6.8$  Hz, 1H), 2.26–2.05 (m, 8H), 1.83 (q,  $J = 7.6$  Hz, 2H), 1.61 (d,  $J = 6.8$  Hz, 3H), 1.05 (t,  $J = 7.6$  Hz, 6H), 0.94 (t,  $J = 7.6$  Hz, 6H), 0.49 (t,  $J = 7.6$  Hz, 3H);  $^{13}\text{C}\{^1\text{H}\}$  NMR (100 MHz,  $\text{CDCl}_3$ ):  $\delta$  161.7, 149.8, 144.2, 141.5, 134.2, 132.3, 131.8, 126.6, 122.1, 65.5, 22.3, 18.9, 18.8, 14.8, 13.8, 11.9, 7.2; HRMS (ESI)  $m/z$  calcd for  $\text{C}_{25}\text{H}_{34}\text{BrO}_2$   $[\text{M}+\text{H}]^+$  445.1737, found 445.1731.

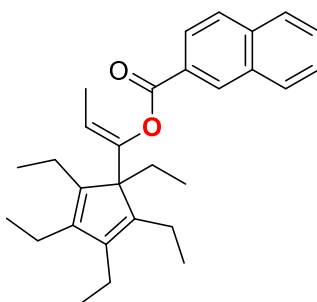

**3an**

**(Z)-1-(1,2,3,4,5-pentaethylcyclopenta-2,4-dien-1-yl)prop-1-en-1-yl 2-naphthoate (3an)** A yellow liquid, 0.076 g, 61% yield;  $^1\text{H}$  NMR (500 MHz,  $\text{CDCl}_3$ ):  $\delta$  8.46 (s, 1H), 7.93–7.80 (m, 4H), 7.58–7.50 (m, 2H), 5.49 (q,  $J = 6.5$  Hz, 1H), 2.31–2.23 (m, 2H), 2.17–2.12 (m, 6H), 1.85 (q,  $J = 7.0$  Hz, 2H), 1.58 (d,  $J = 7.5$  Hz, 3H), 1.12 (t,  $J = 8.0$  Hz, 6H), 0.81 (t,  $J = 7.5$  Hz, 6H), 0.47 (t,  $J = 7.0$  Hz, 3H);  $^{13}\text{C}$  NMR (125 MHz,  $\text{CDCl}_3$ ):  $\delta$  163.0, 150.3, 144.5, 141.5, 135.6, 132.5, 131.5, 129.4, 128.2, 127.9, 127.9, 127.6, 126.6, 125.8, 111.7, 65.8, 22.4, 19.0, 19.0, 14.9, 14.0, 12.0, 7.5; HRMS (ESI)  $m/z$  calcd for  $\text{C}_{29}\text{H}_{37}\text{O}_2$   $[\text{M} + \text{H}]^+$ : 417.2788, found 417.2773.

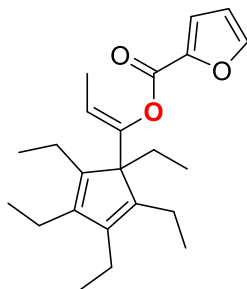

**3ao**

**(Z)-1-(1,2,3,4,5-pentaethylcyclopenta-2,4-dien-1-yl)prop-1-en-1-yl furan-2-carboxylate (3ao).** Light yellow liquid, 0.060 g, 56% yield.  $^1\text{H}$  NMR (400 MHz,  $\text{CDCl}_3$ ):  $\delta$  7.53 (s, 1H), 6.95 (d,  $J = 2.8$  Hz, 1H), 6.43 (s, 1H), 5.44 (q,  $J = 6.8$  Hz, 1H), 2.24–2.03 (m, 8H), 1.80 (q,  $J = 6.8$  Hz, 2H), 1.55 (d,  $J = 6.8$  Hz, 3H), 1.07 (t,  $J = 7.6$  Hz, 6H), 0.85 (t,  $J = 7.6$  Hz, 6H), 0.47 (t,  $J = 7.2$  Hz, 3H);  $^{13}\text{C}\{^1\text{H}\}$  NMR (100 MHz,  $\text{CDCl}_3$ ):  $\delta$  154.8, 149.5, 146.2, 144.4, 144.3, 141.1, 117.6, 111.9, 111.5, 65.4, 22.1, 18.8, 18.7, 14.6, 13.8, 11.7, 7.9; HRMS (ESI)  $m/z$  calcd for  $\text{C}_{23}\text{H}_{33}\text{O}_3$   $[\text{M}+\text{H}]^+$  357.2424, found 357.2422.

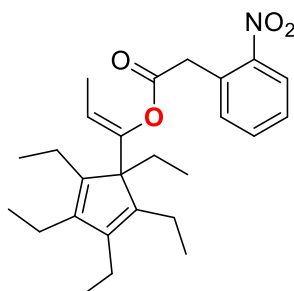

**3ap**

**(Z)-1-(1,2,3,4,5-pentaethylcyclopenta-2,4-dien-1-yl)prop-1-en-1-yl 2-(2-nitrophenyl)acetate (3ap).** Light yellow liquid, 0.092 g, 72% yield.  $^1\text{H}$  NMR (400 MHz,  $\text{CDCl}_3$ ):  $\delta$  8.09 (d,  $J = 8.4$  Hz, 1H), 7.57–7.54 (m, 1H), 7.46–7.42 (m, 1H), 7.22 (d,  $J = 7.6$  Hz, 1H), 5.33–5.28 (m, 1H), 3.87 (s, 2H), 2.27–2.21 (m, 3H), 2.09–1.94 (m, 5H), 1.72 (q,  $J = 6.8$  Hz, 2H), 1.50 (d,  $J = 6.8$  Hz, 3H), 1.08 (t,  $J = 7.2$  Hz, 6H), 0.93 (t,  $J = 7.2$  Hz, 6H), 0.44 (t,  $J = 7.2$  Hz, 3H);  $^{13}\text{C}\{^1\text{H}\}$  NMR (100 MHz,  $\text{CDCl}_3$ ):  $\delta$  165.9, 149.8, 148.7, 143.8, 141.5, 133.3, 133.2, 129.8, 128.4, 125.2, 65.3, 39.1, 22.2, 18.9, 18.7, 15.2, 13.6, 11.5, 7.2; HRMS (ESI)  $m/z$  calcd for  $\text{C}_{26}\text{H}_{36}\text{NO}_4$   $[\text{M}+\text{H}]^+$  426.2639, found 426.2640.

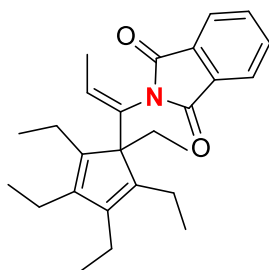

**3aq**

**(Z)-2-(1-(1,2,3,4,5-pentaethylcyclopenta-2,4-dien-1-yl)prop-1-en-1-yl)isoindoline-1,3-dione (3aq).** Light yellow liquid, 0.063 g, 54% yield.  $^1\text{H}$  NMR (400 MHz,  $\text{CDCl}_3$ ):  $\delta$  7.76–7.65 (m, 4H), 6.05 (q,  $J = 6.4$  Hz, 1H), 2.34–2.02 (m, 8H), 1.89 (q,  $J = 7.2$  Hz, 2H), 1.54 (d,  $J = 6.8$  Hz, 3H), 1.08 (d,  $J = 7.6$  Hz, 6H), 0.75 (d,  $J = 7.2$  Hz, 6H), 0.58 (t,  $J = 7.2$  Hz, 3H);  $^{13}\text{C}\{^1\text{H}\}$  NMR (100 MHz,  $\text{CDCl}_3$ ):  $\delta$  166.9, 144.4, 142.7, 134.0, 133.5, 131.8, 126.8, 112.9, 67.1, 22.0, 19.5, 18.6, 14.2, 13.8, 13.3, 8.2; HRMS (ESI)  $m/z$  calcd for  $\text{C}_{26}\text{H}_{34}\text{NO}_2$   $[\text{M}+\text{H}]^+$  392.2584, found 392.2594.

### 3. Synthesis of compounds 4 and 5

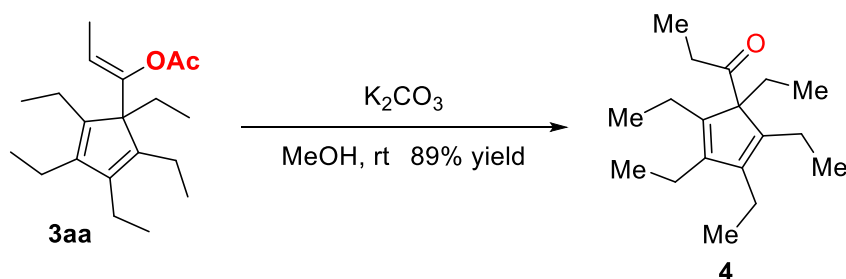

In a 10 mL reaction flask was charged with **3aa** (0.060 g, 0.2 mmol),  $\text{K}_2\text{CO}_3$  (0.033 g, 1.2 equiv.). MeOH (2 mL) was then added via syringe and the reaction vessel was sealed with a Teflon cap. The reaction mixture was stirred vigorously at room temperature for 60 h until **3aa** was consumed completely (monitored by TLC). At this time, the solvent was removed under reduced pressure and the crude product was purified by flash column chromatography (the crude residue was dry loaded on silica gel, eluents with a mixed eluents petroleum ether/ethyl acetate = 50/1) to afford **4**.

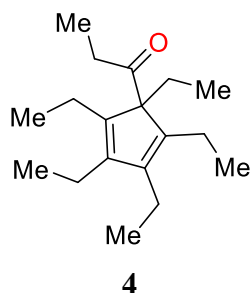

**1-(1,2,3,4,5-pentaethylcyclopenta-2,4-dien-1-yl)propan-1-one (4).** Yellow oil (0.046 g, 89% yield).  $^1\text{H}$  NMR (500 MHz,  $\text{CDCl}_3$ ):  $\delta$  2.35-2.32 (m, 4H), 2.12-2.07 (m, 4H), 2.05 (q,  $J = 7.5$  Hz, 2H), 1.97 (q,  $J = 7.5$  Hz, 2H), 1.08 (t,  $J = 7.5$  Hz, 6H), 0.96 (t,  $J = 8.0$  Hz, 6H), 0.86 (t,  $J = 7.5$  Hz, 3H), 0.37 (t,  $J = 7.5$  Hz, 3H);  $^{13}\text{C}\{^1\text{H}\}$  NMR (125 MHz,  $\text{CDCl}_3$ ):  $\delta$  211.6, 147.5, 140.6, 75.7, 28.3, 20.3, 19.1, 19.0, 14.7, 14.2, 8.7, 7.0; HRMS (ESI)  $m/z$ :  $[\text{M} + \text{H}]^+$  Calcd for  $\text{C}_{18}\text{H}_{31}\text{O}$  263.2369; Found 263.2370.

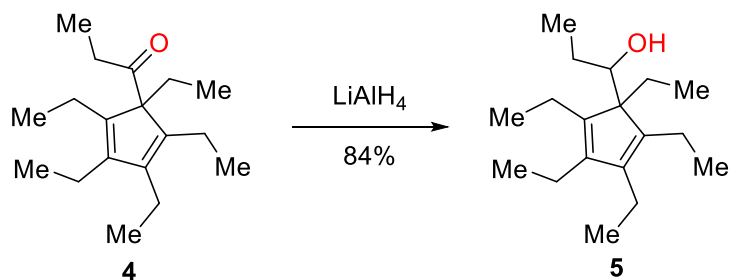

In a 10 mL reaction flask was charged with **4** (0.052 g, 0.2 mmol),  $\text{LiAlH}_4$  (0.015 g, 2.0 equiv.). THF (2 mL) was then added via syringe and the reaction vessel was sealed with a Teflon cap. The reaction mixture was stirred vigorously 0 °C to room temperature for 1 h until **4** was consumed completely (monitored by TLC). At this time, the solvent was removed under reduced pressure and the crude product was purified by flash column chromatography (the crude residue was dry loaded on silica gel, eluents with a mixed eluents petroleum ether/ethyl acetate = 10/1) to afford **5**.

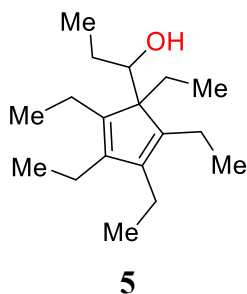

**1-(1,2,3,4,5-pentaethylcyclopenta-2,4-dien-1-yl)propan-1-ol (5).** Yellow liquid, 0.044 g, 84% yield;  $^1\text{H}$  NMR (500 MHz,  $\text{CDCl}_3$ ):  $\delta$  3.58 (d,  $J = 10.0$  Hz, 1H), 2.36-

2.29 (m, 1H), 2.26-2.12 (m, 6H), 2.06-1.93 (m, 2H), 1.61-1.54 (m, 1H), 1.33-1.25 (m, 2H), 1.22-1.13 (m, 1H), 1.09 (t,  $J = 7.5$  Hz, 3H), 1.04-1.00 (m, 9H), 0.92 (t,  $J = 7.5$  Hz, 3H), 0.40 (t,  $J = 7.5$  Hz, 3H);  $^{13}\text{C}$  NMR (125 MHz,  $\text{CDCl}_3$ ):  $\delta$  144.0, 143.9, 142.7, 141.7, 78.1, 66.2, 24.5, 23.6, 19.5, 18.9, 18.8, 18.7, 15.3, 15.1, 14.3, 14.1, 11.8, 7.6.; HRMS (ESI)  $m/z$  calcd for  $\text{C}_{18}\text{H}_{33}\text{O}$   $[\text{M} + \text{H}]^+$ : 265.2526, found 265.2530.

#### 4. Gram scale preparation of cyclopentadiene **3aa**

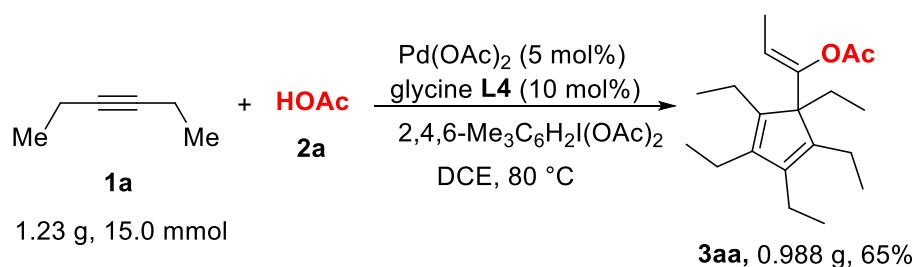

In a 100 mL reaction flask was charged with  $\text{Pd}(\text{OAc})_2$  (56 mg, 0.25 mmol, 5 mol%), glycine **L4** (36 mg, 0.5 mmol, 10 mol%), and DCE (10.0 mL). The mixture was stirred at room temperature for 30 min under  $\text{N}_2$ . Then, 3-hexyne **1a** (1.23 g, 15.0 mmol), HOAc **2a** (1.5 g, 25.0 mmol, 5.0 equiv.), 2,4,6- $\text{Me}_3\text{C}_6\text{H}_2\text{I}(\text{OAc})_2$  (3.6 g, 10 mmol, 2.0 equiv.) and DCE (60.0 mL) were added. The reaction vessel was once again sealed with a Teflon cap. The reaction mixture was stirred vigorously at 80 °C in an oil bath for 48 h until 3-hexyne **1a** was consumed completely (monitored by TLC). At this time, the reaction was quenched by  $\text{H}_2\text{O}$  (30 mL), extraction with DCM (30 mL  $\times$  2), and the organic layers were combined and washed with saturated  $\text{NaHCO}_3$  (30 mL), dried over  $\text{Na}_2\text{SO}_4$ , and the solvent was filtered. The solvent was removed under reduced pressure and the crude product was purified by flash column chromatography (1/20 to 1/10, ethyl acetate/petroleum ether) to afford cyclopentadiene **3aa** (0.988 g, 65% yield) as yellow liquid.

#### 5. NMR spectra for compounds 3-5

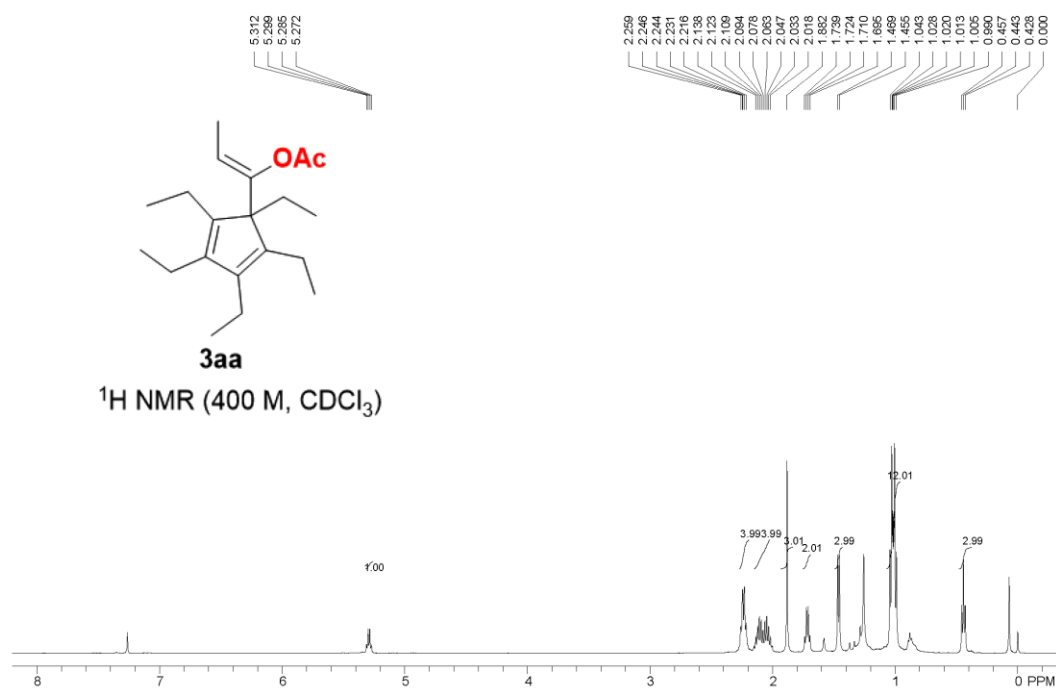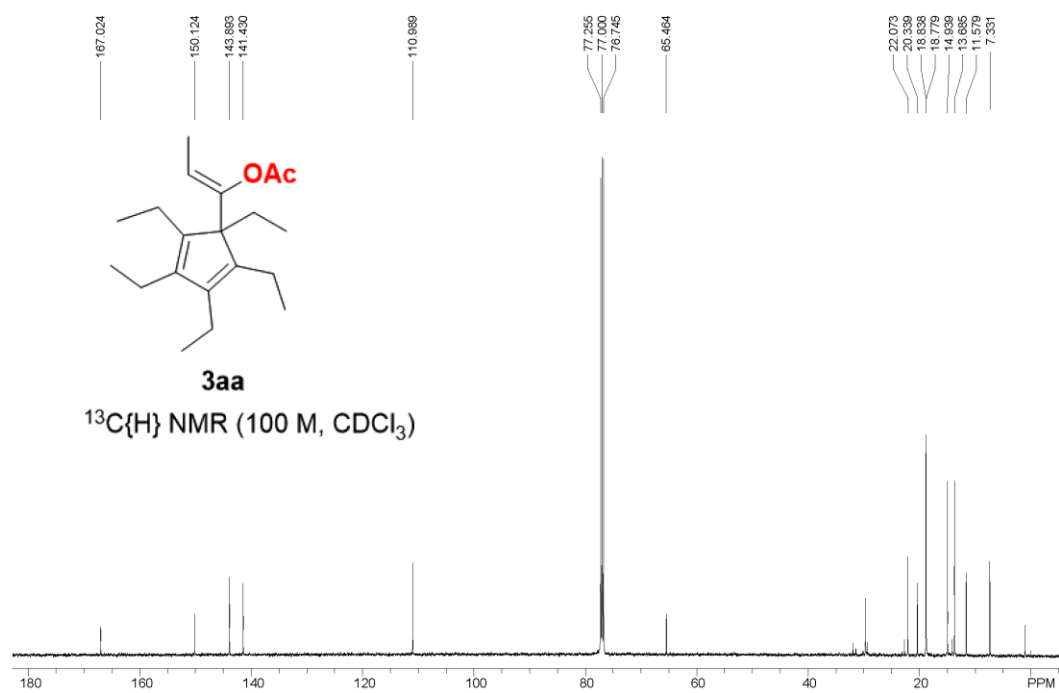



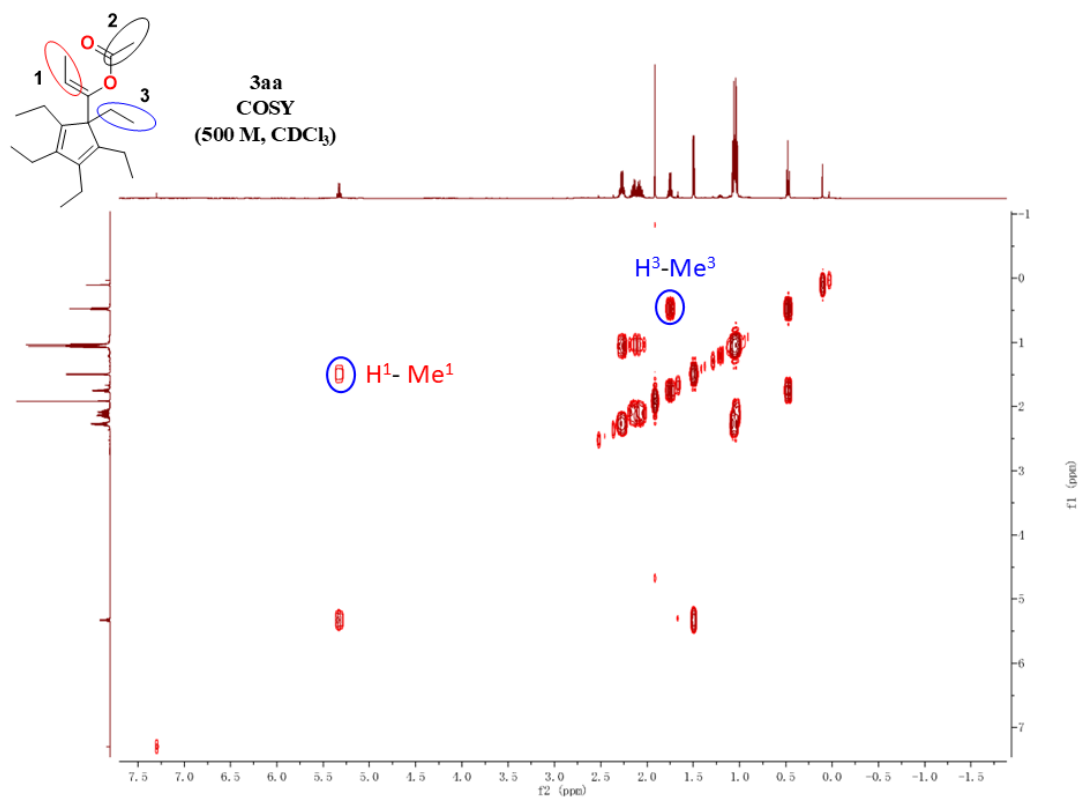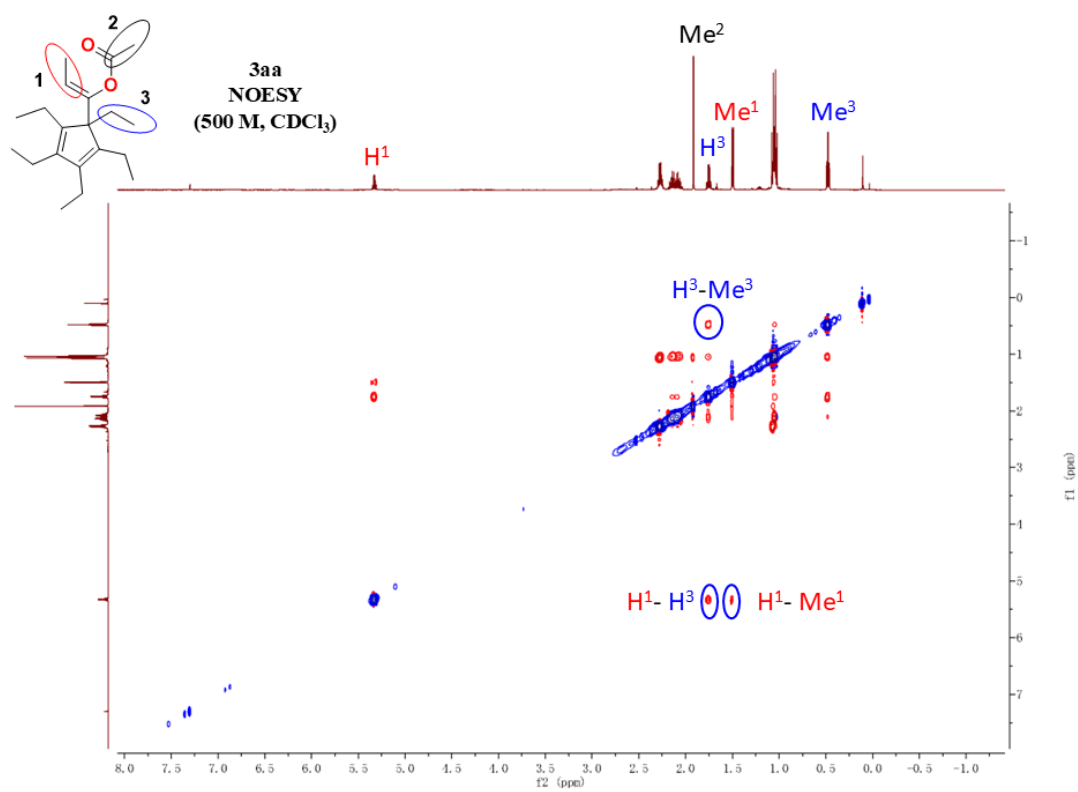

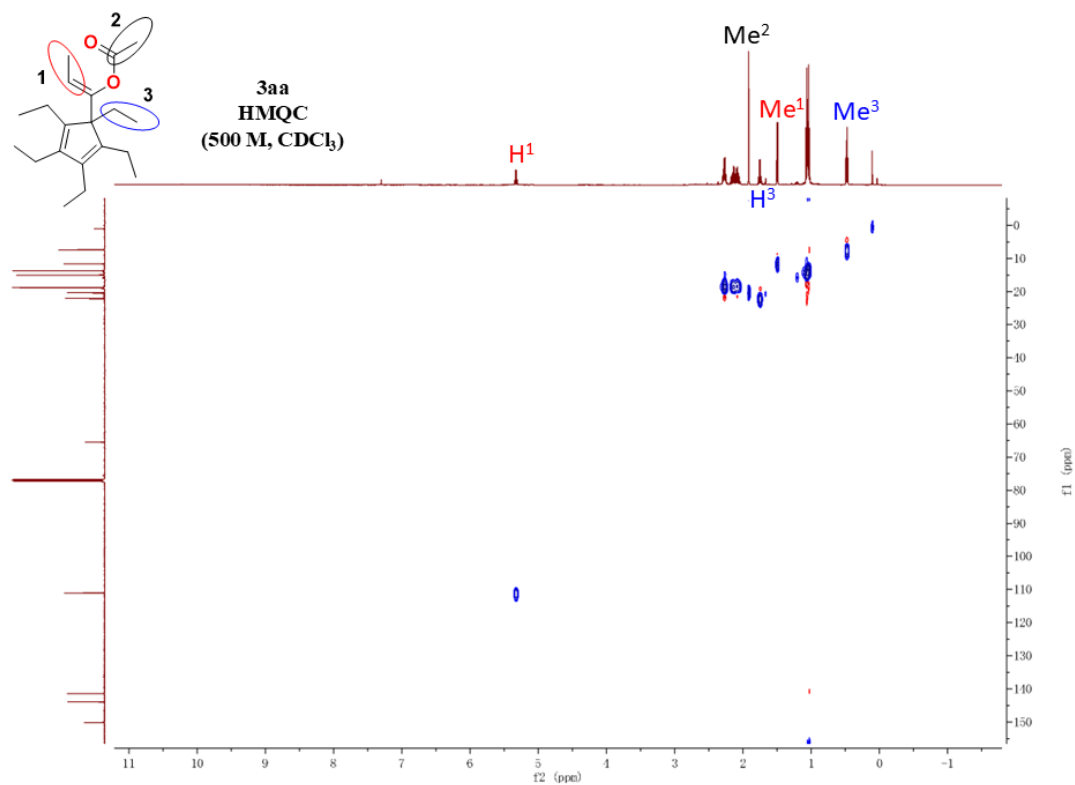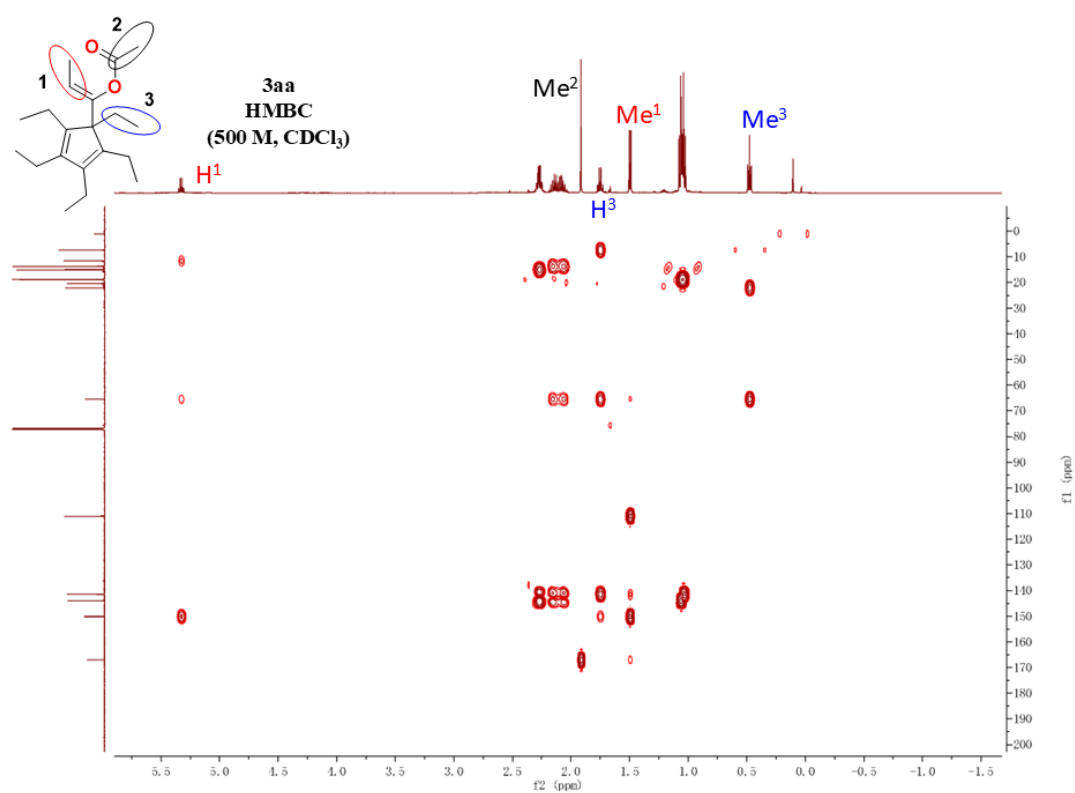

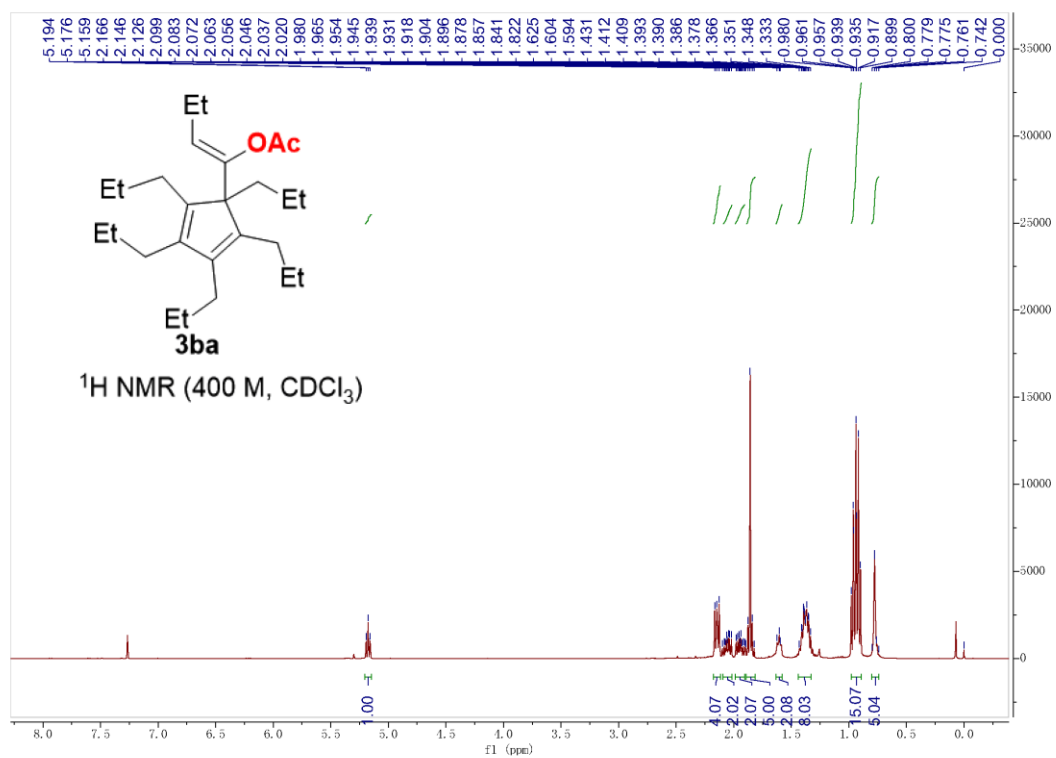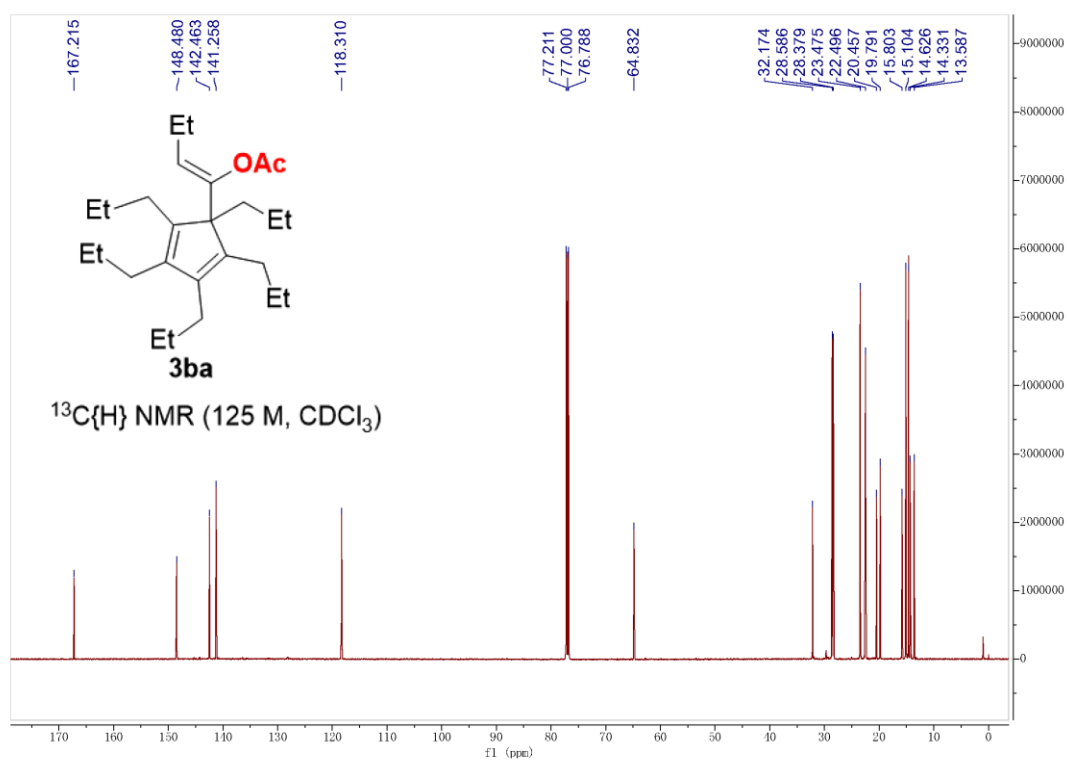

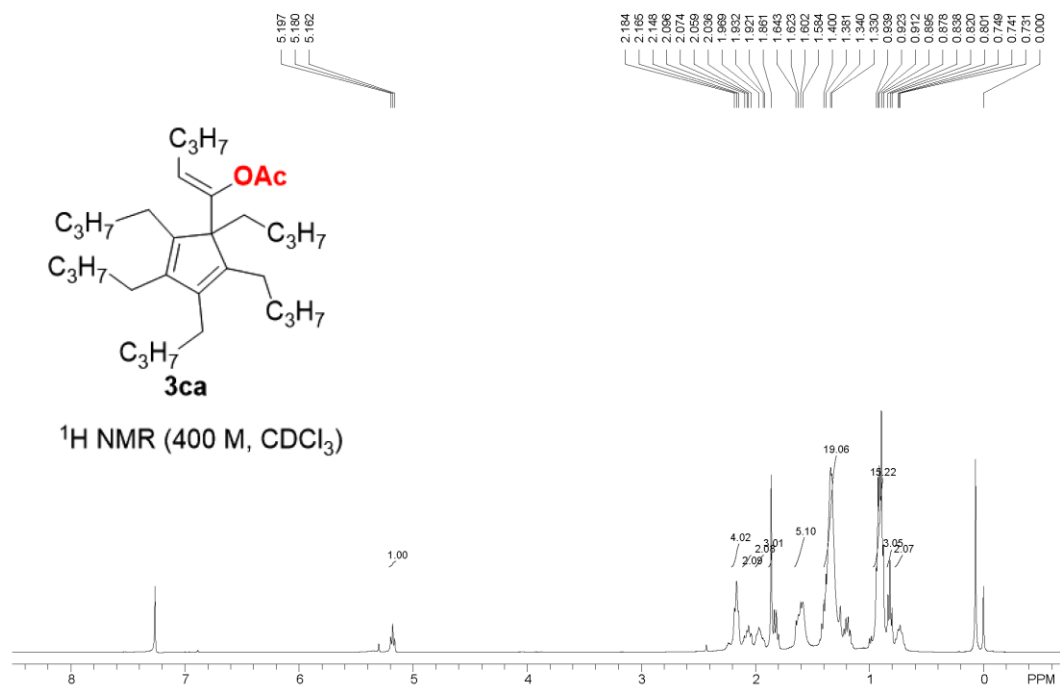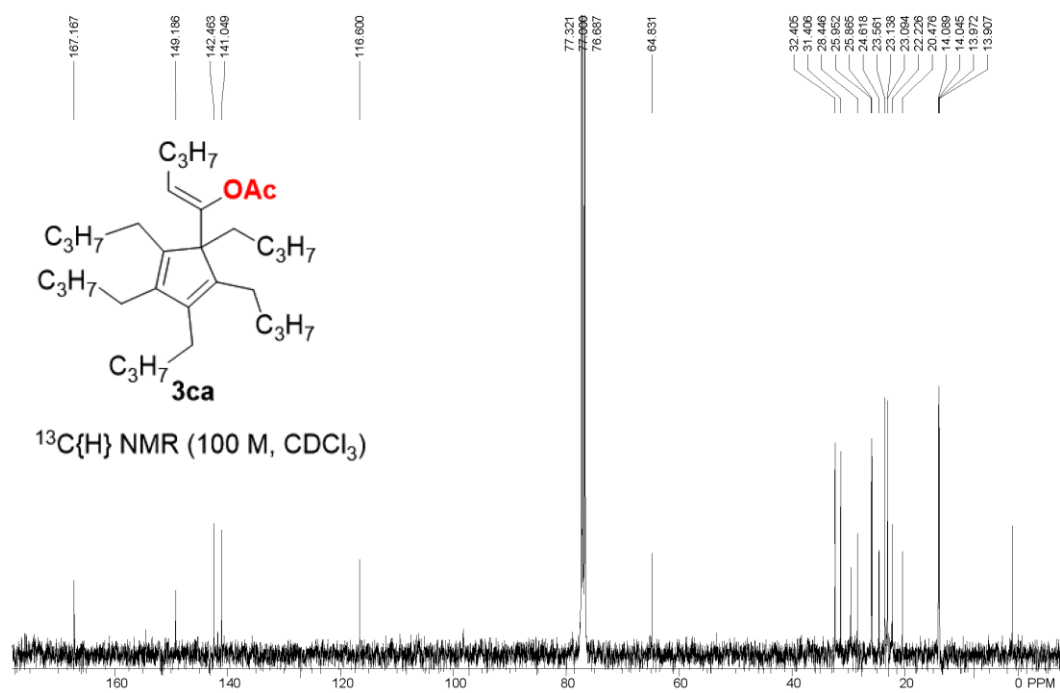

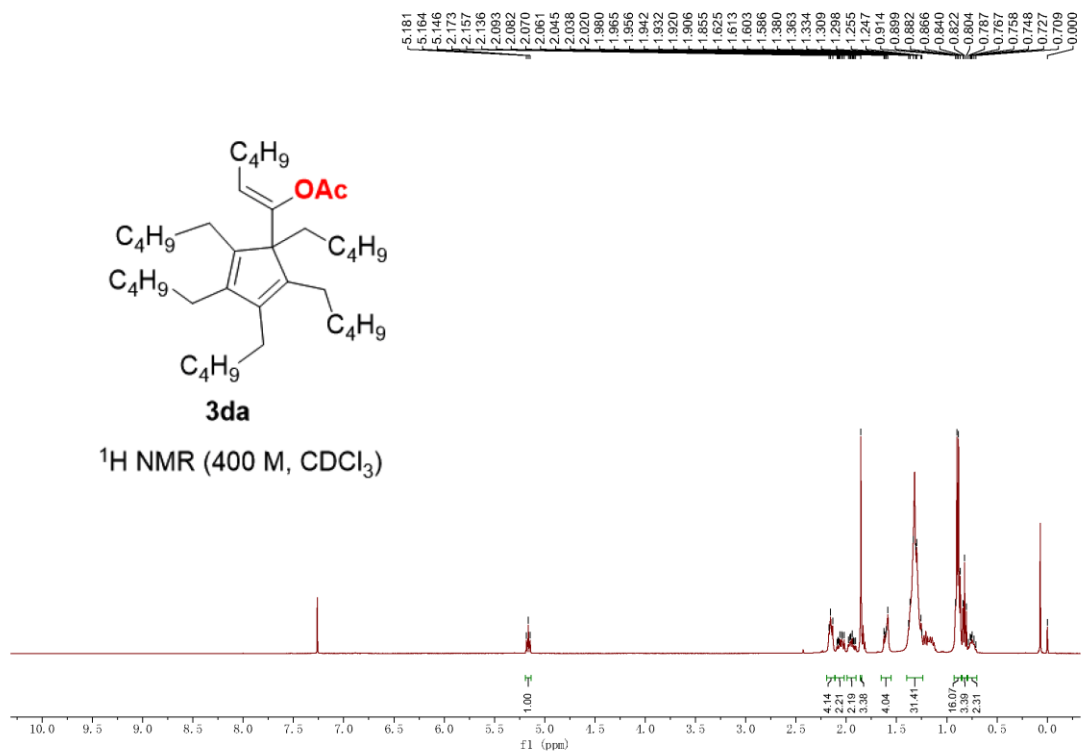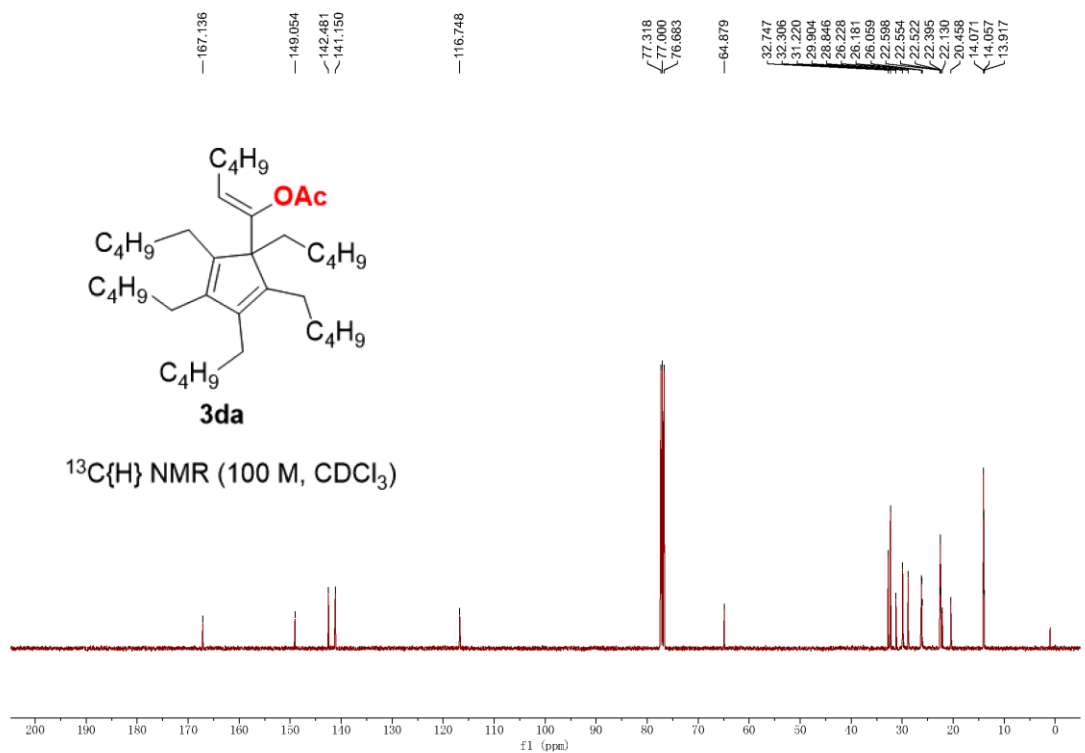

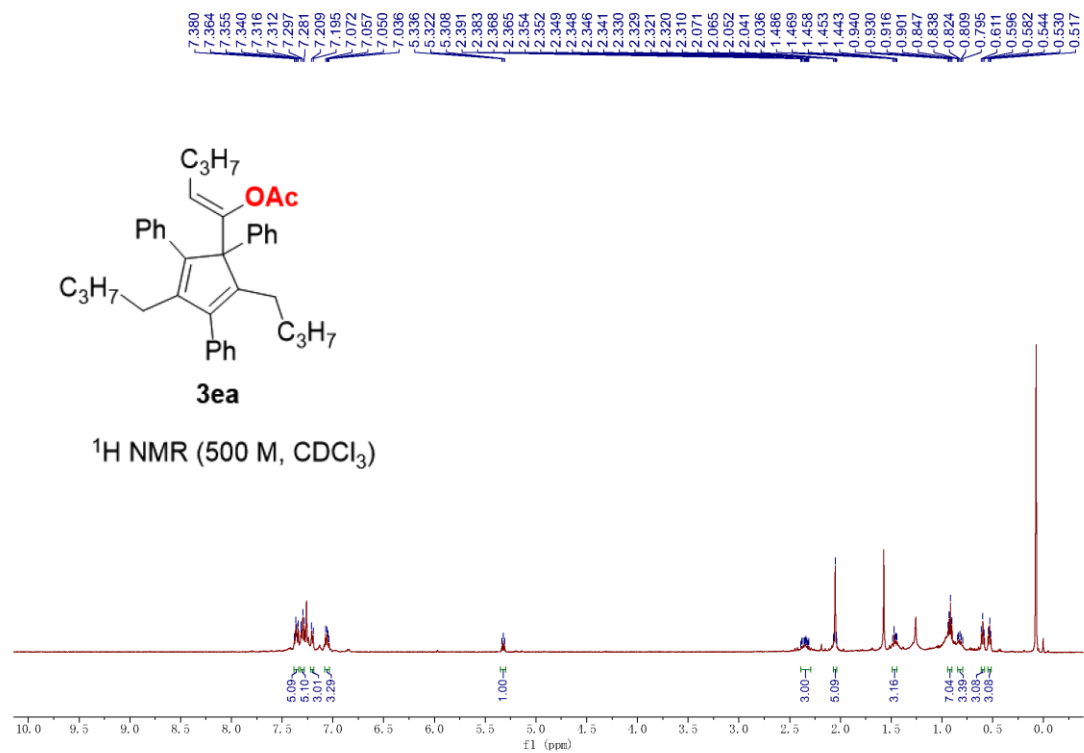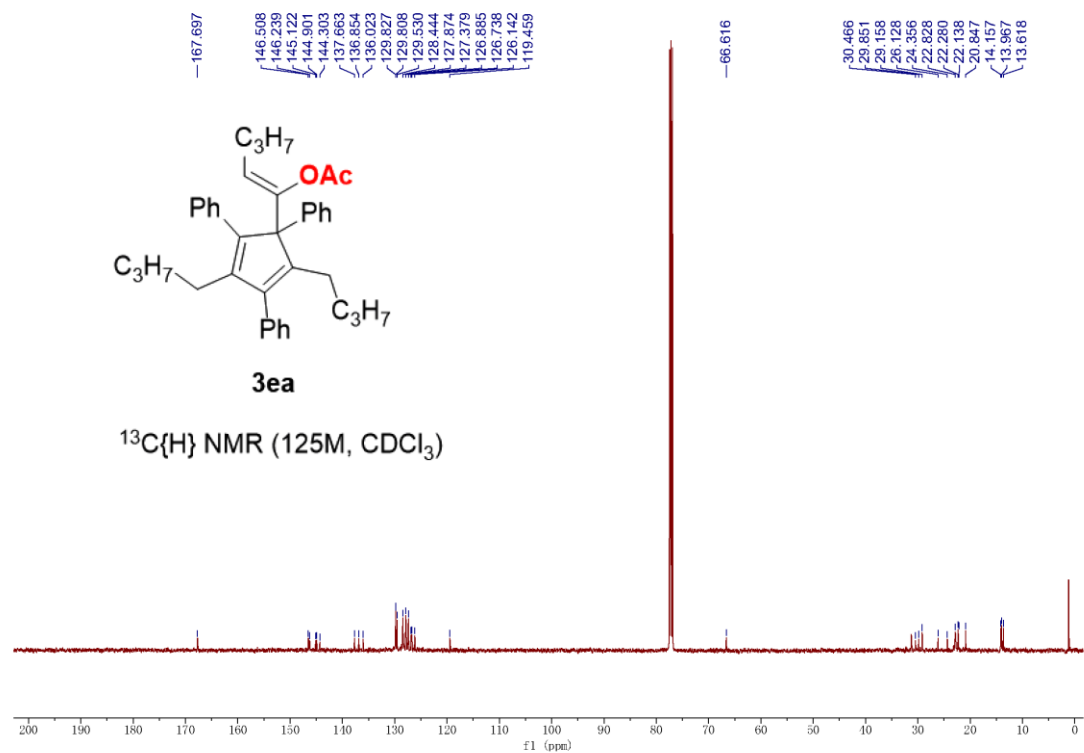

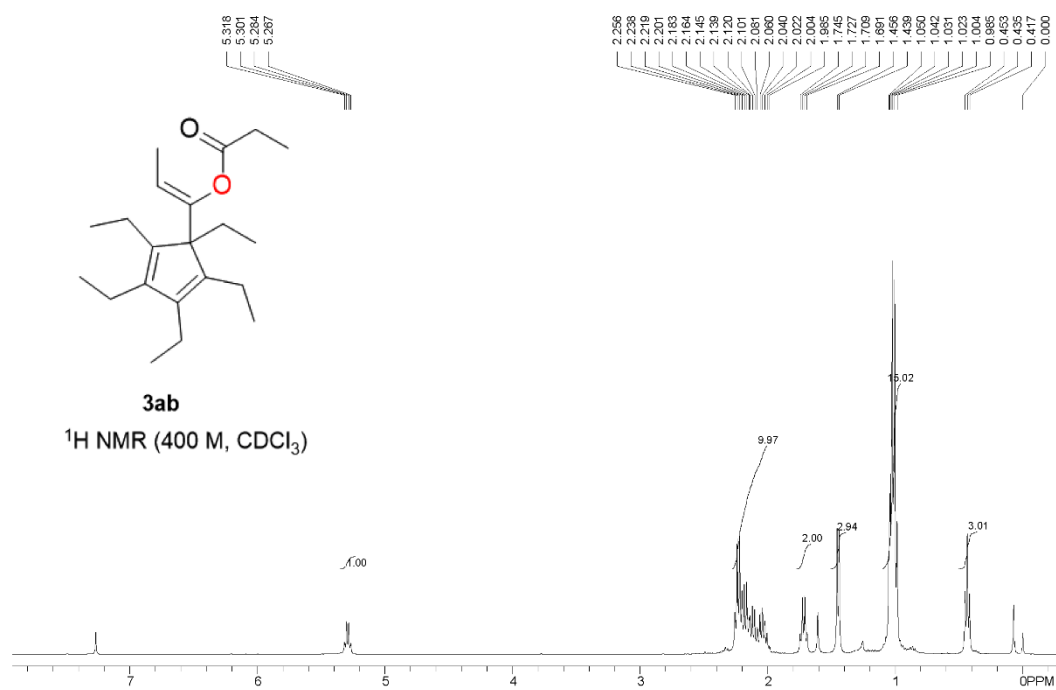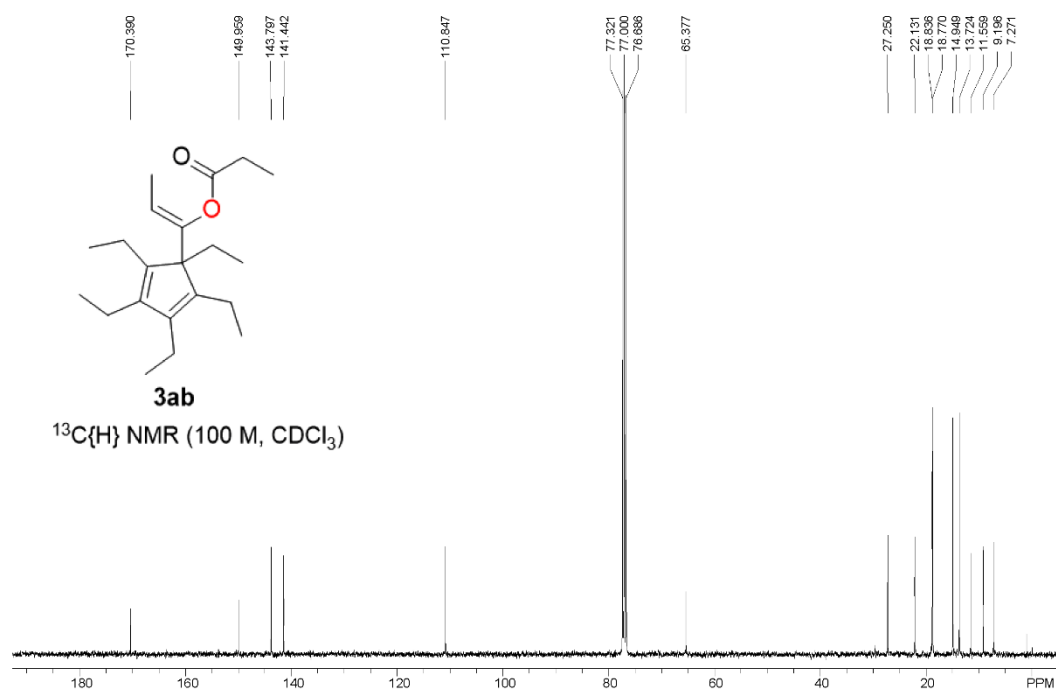

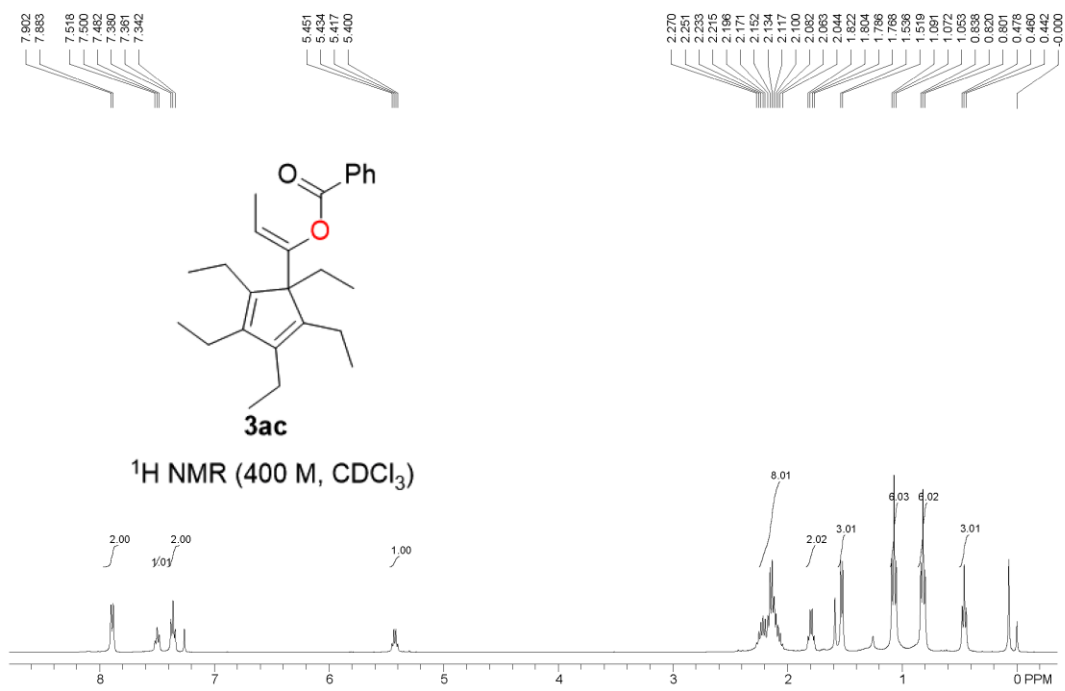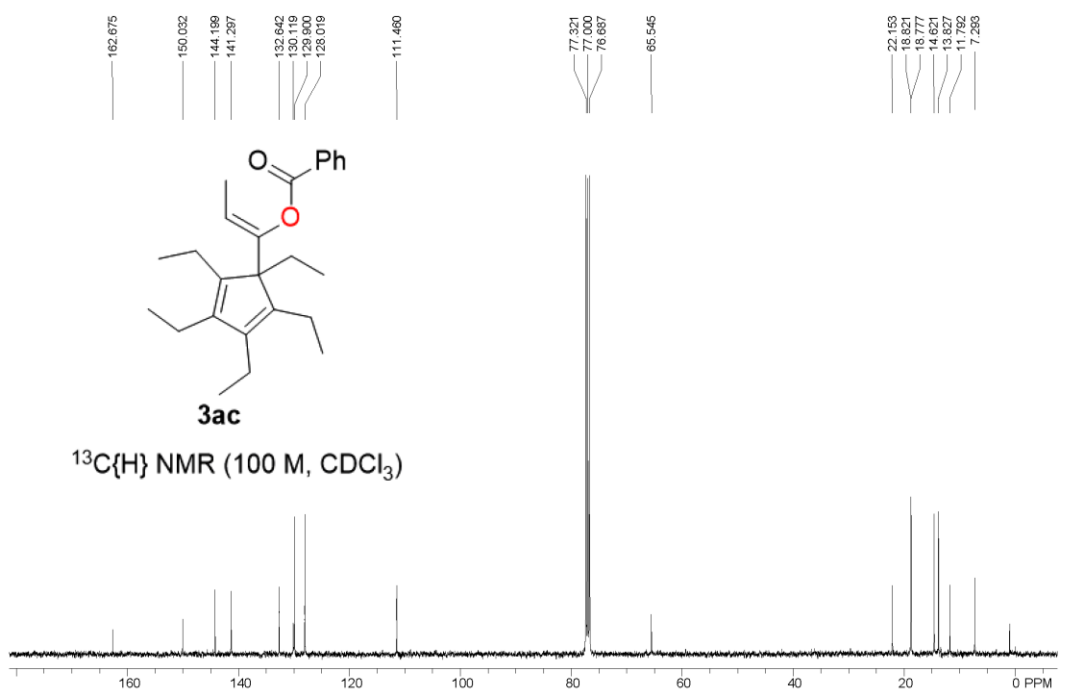



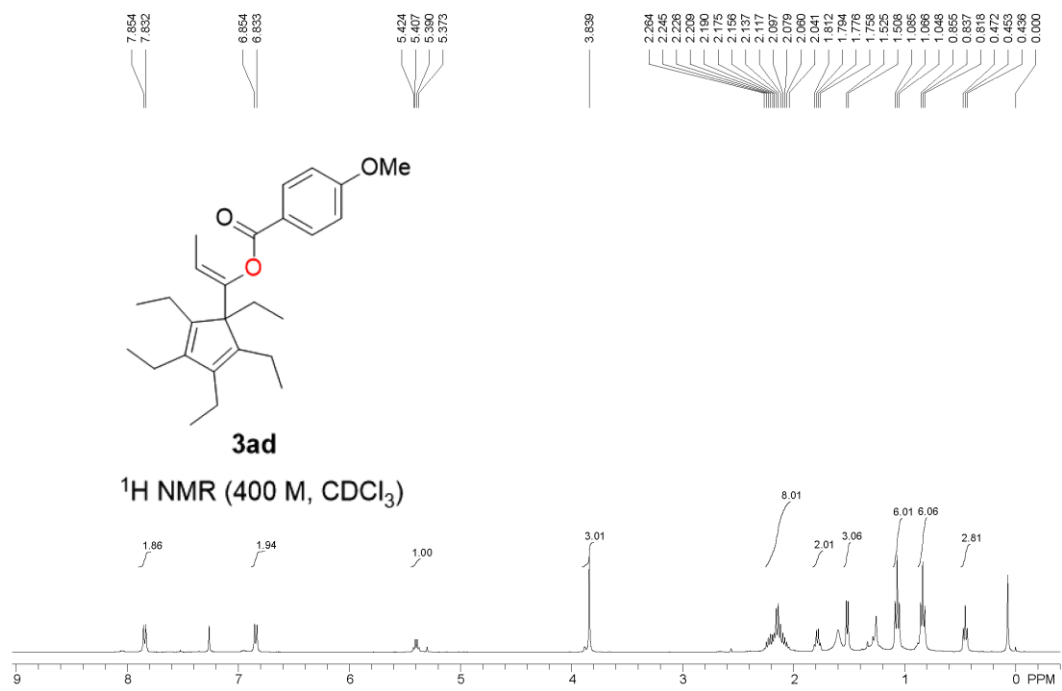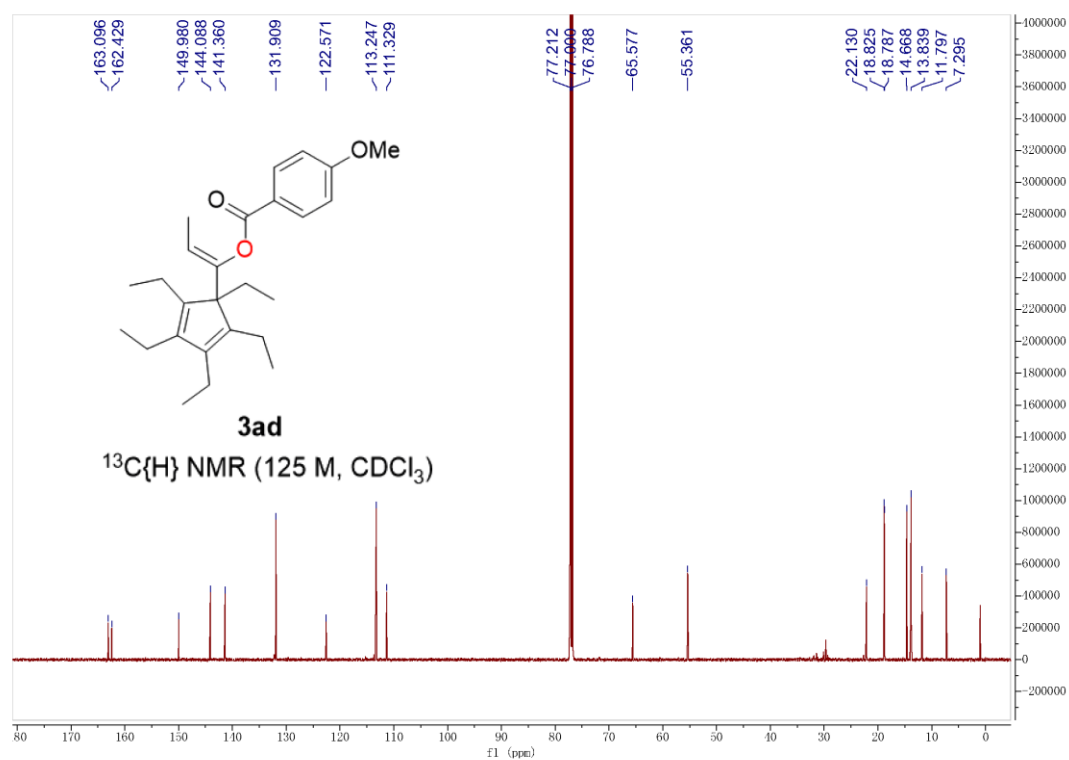

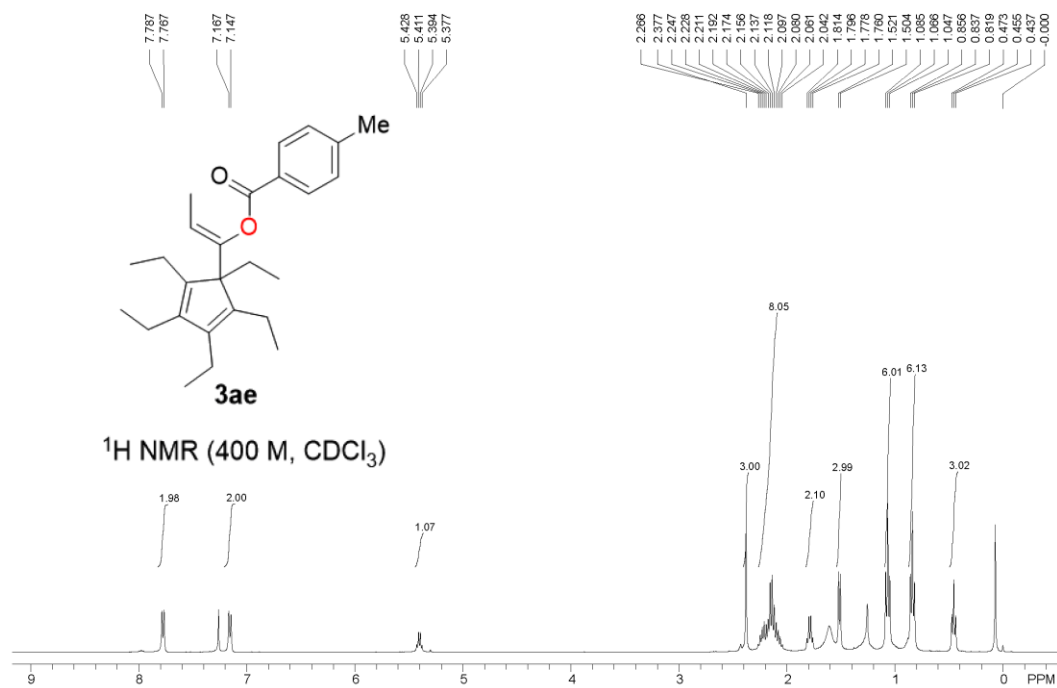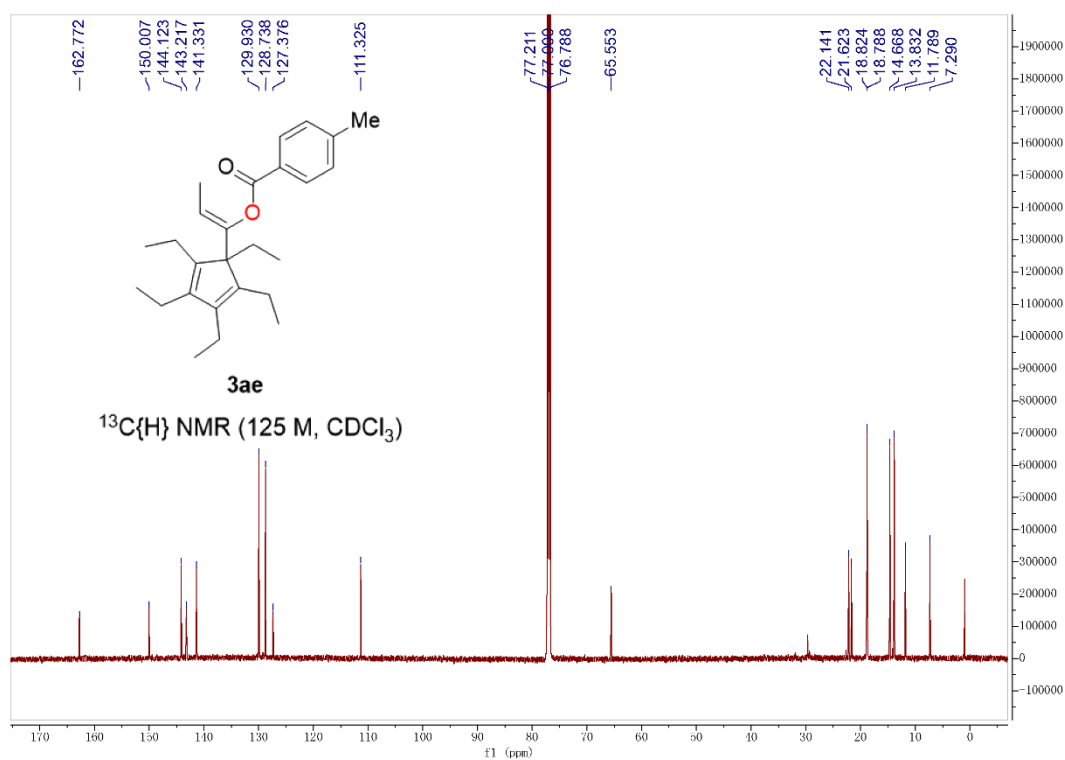

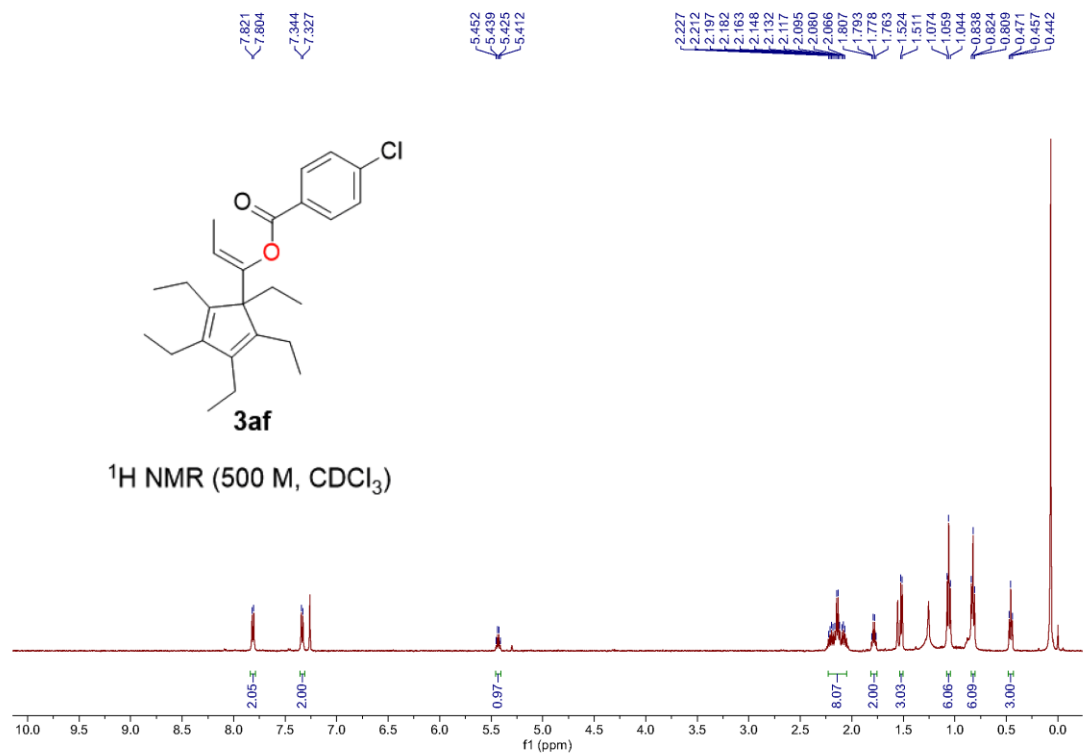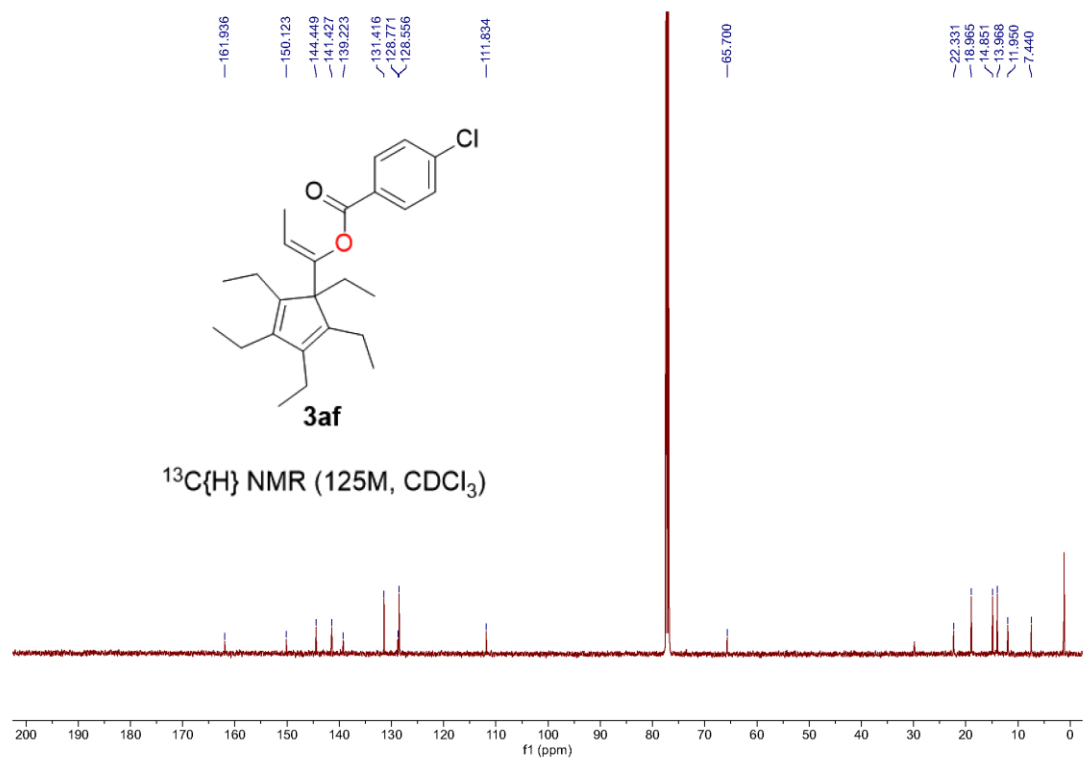

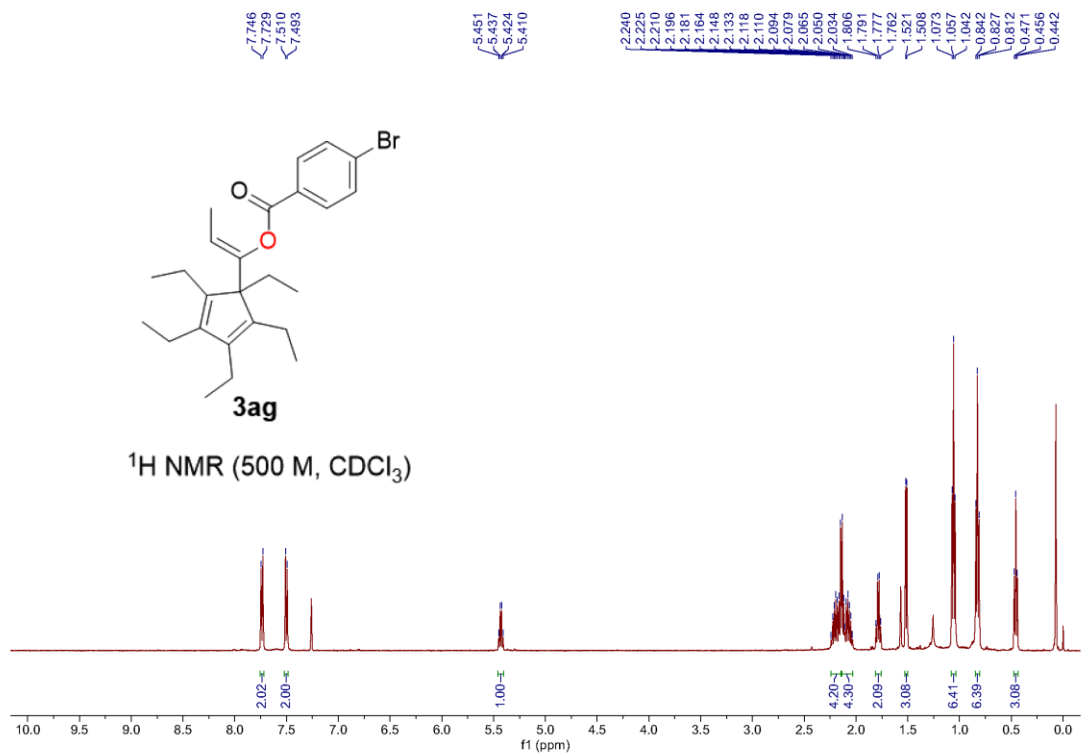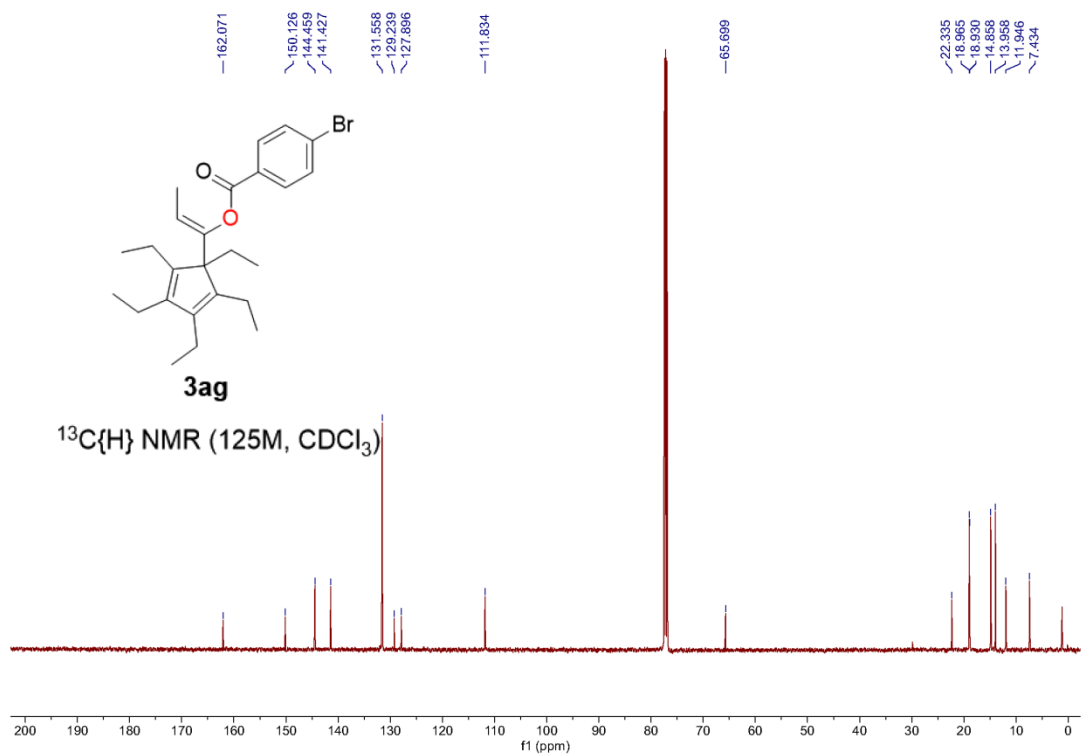

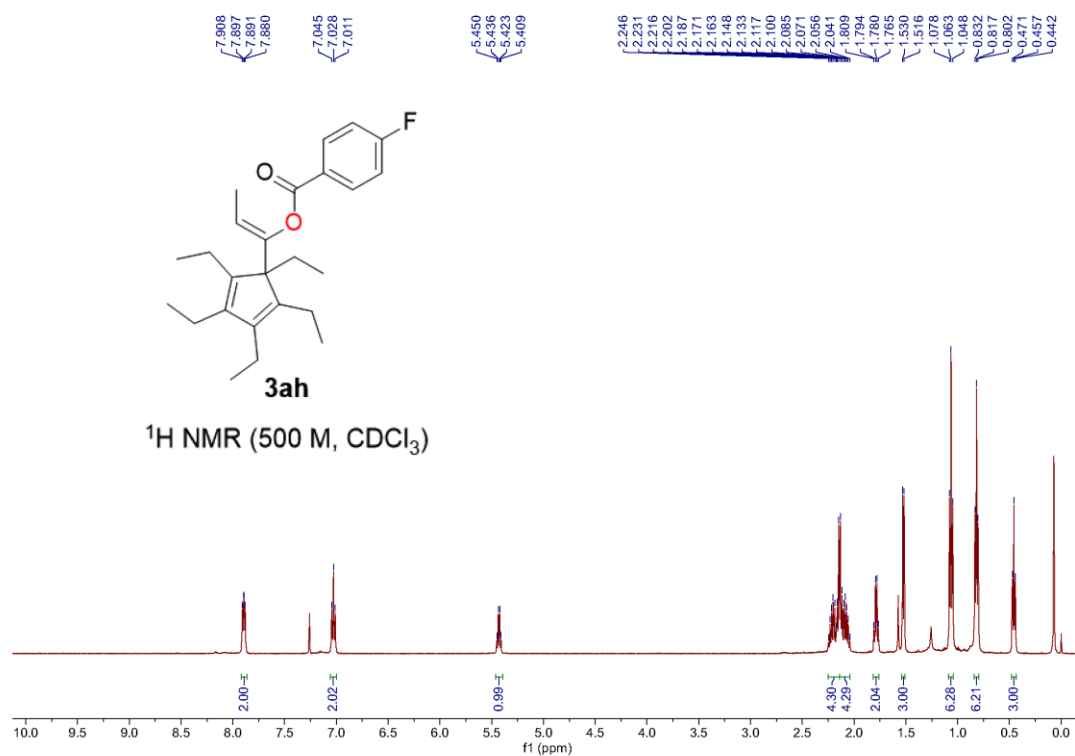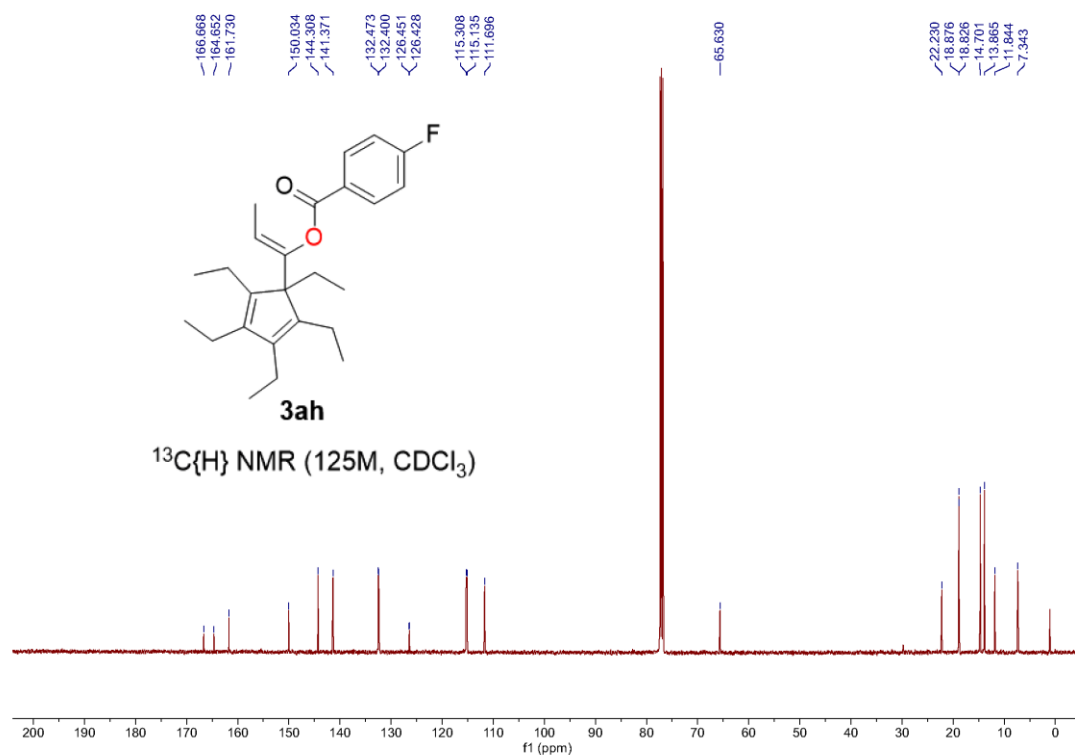

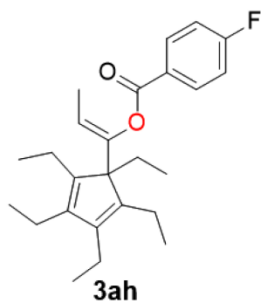

$^{19}\text{F}$  NMR (470M,  $\text{CDCl}_3$ )

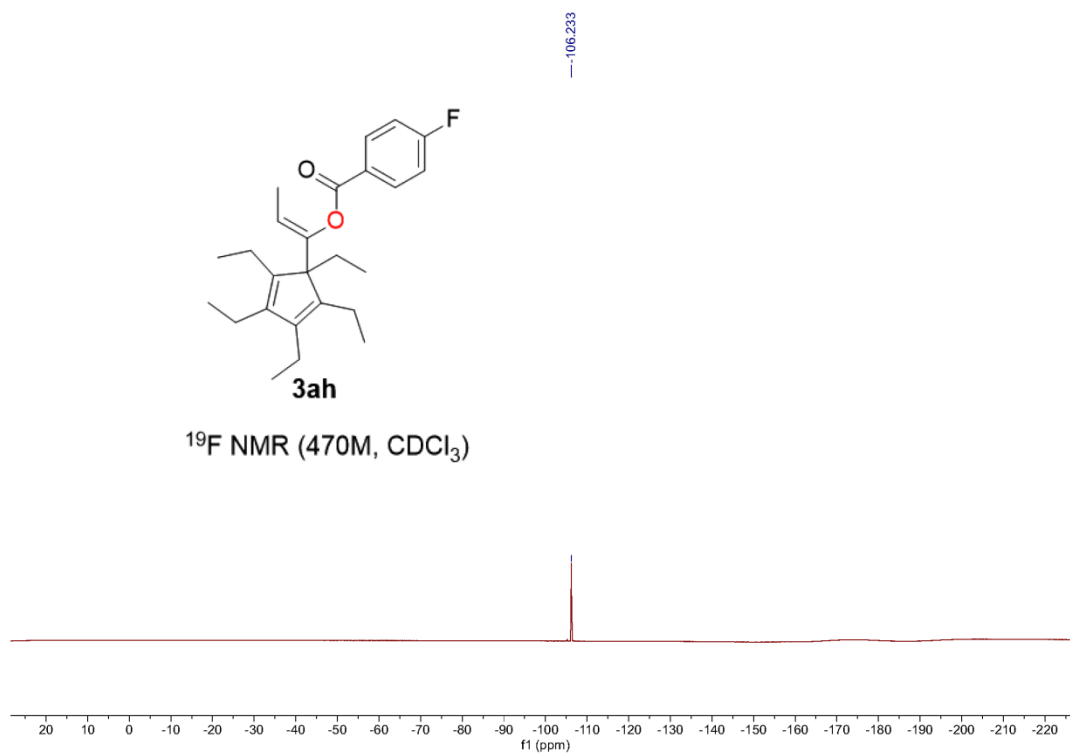

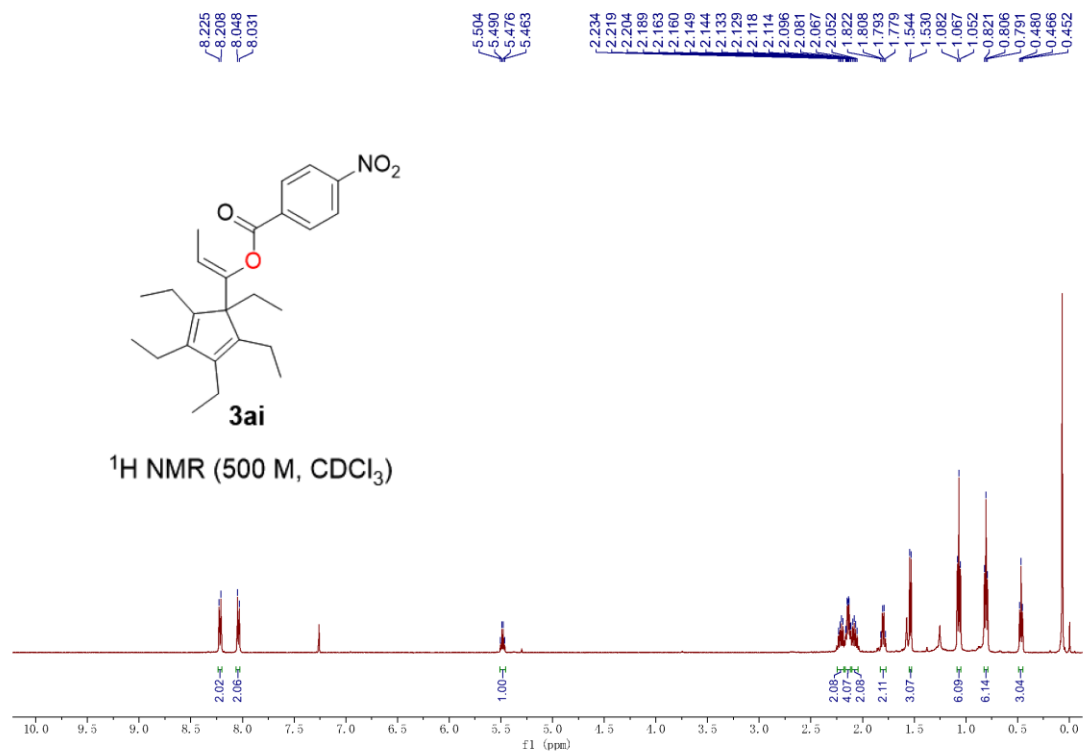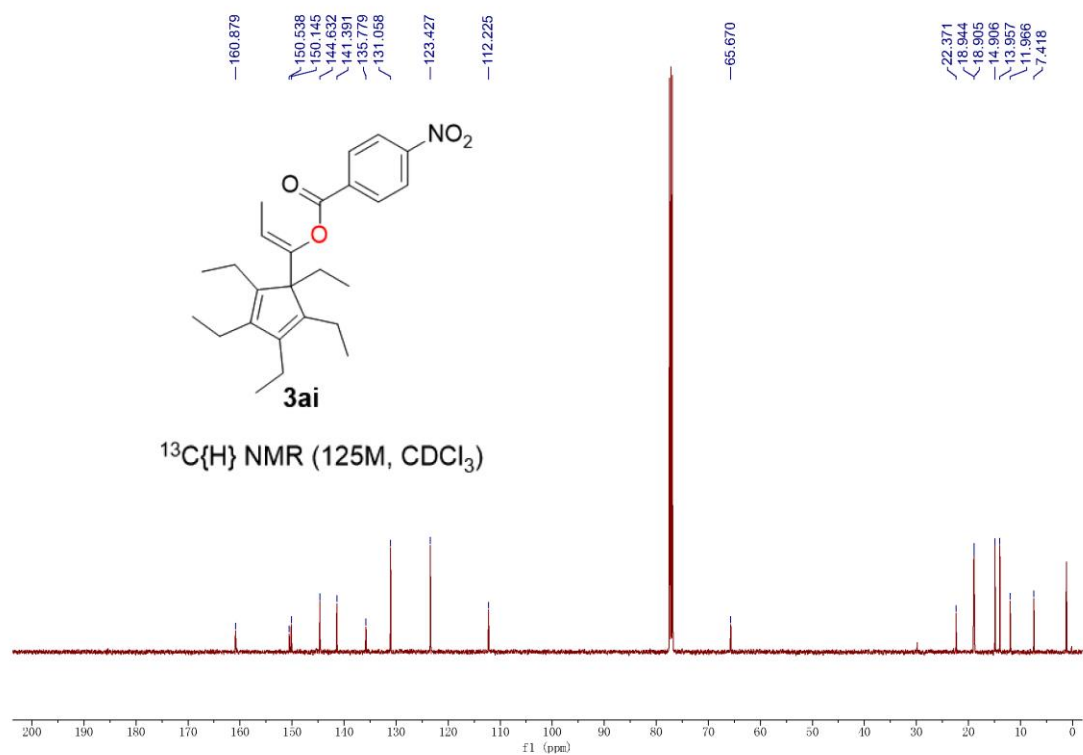

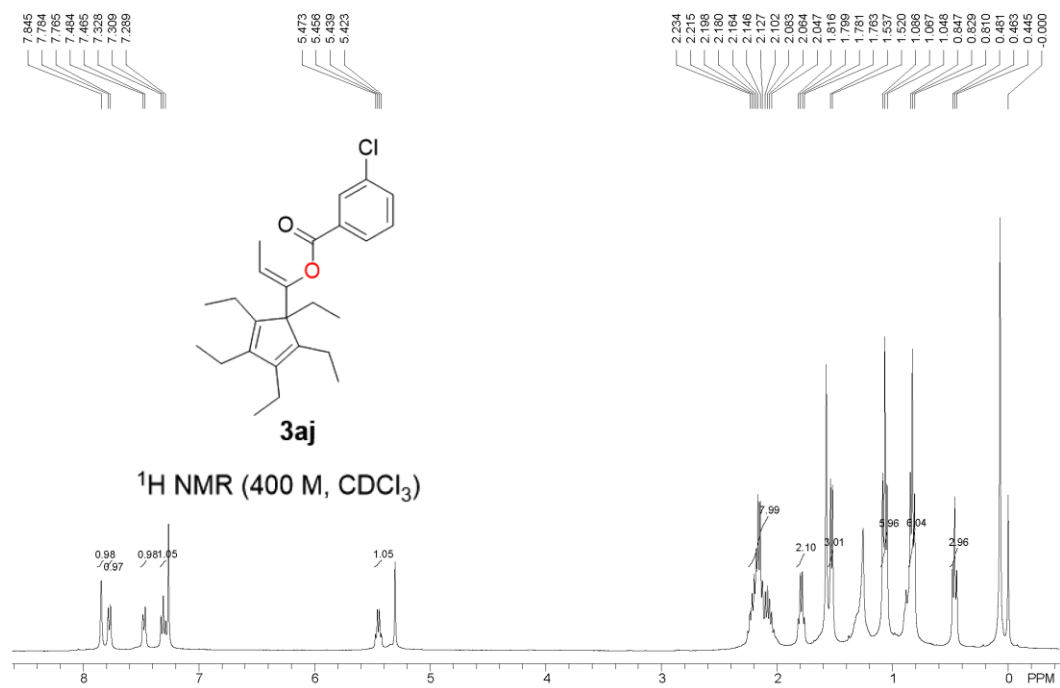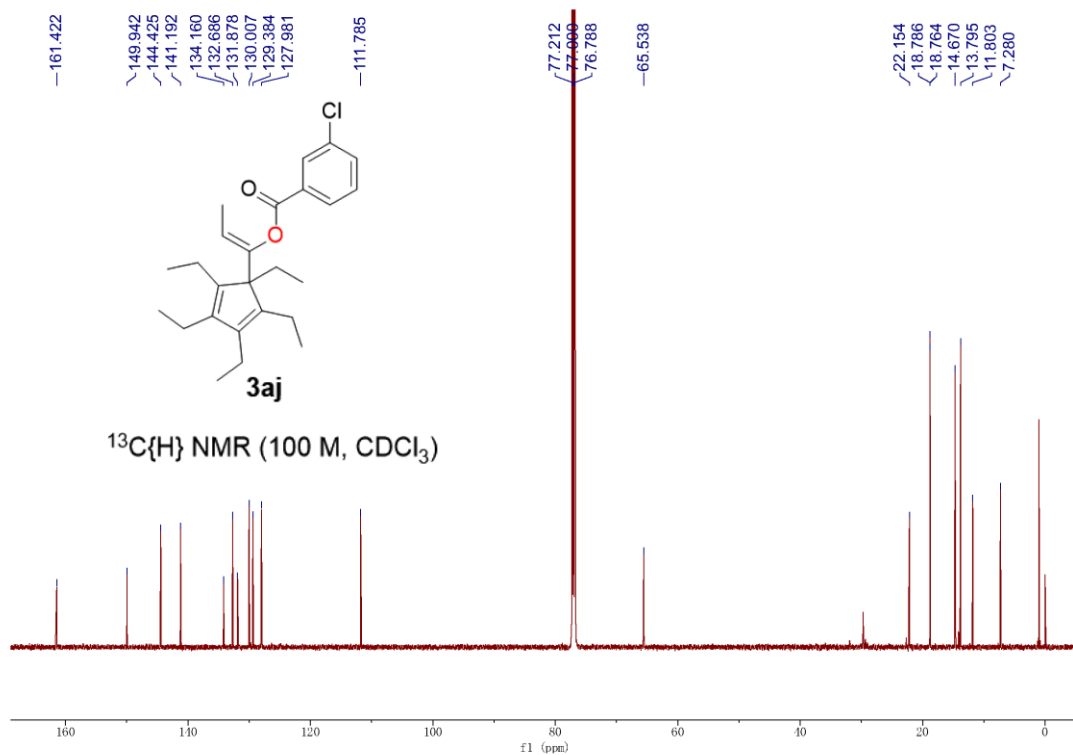



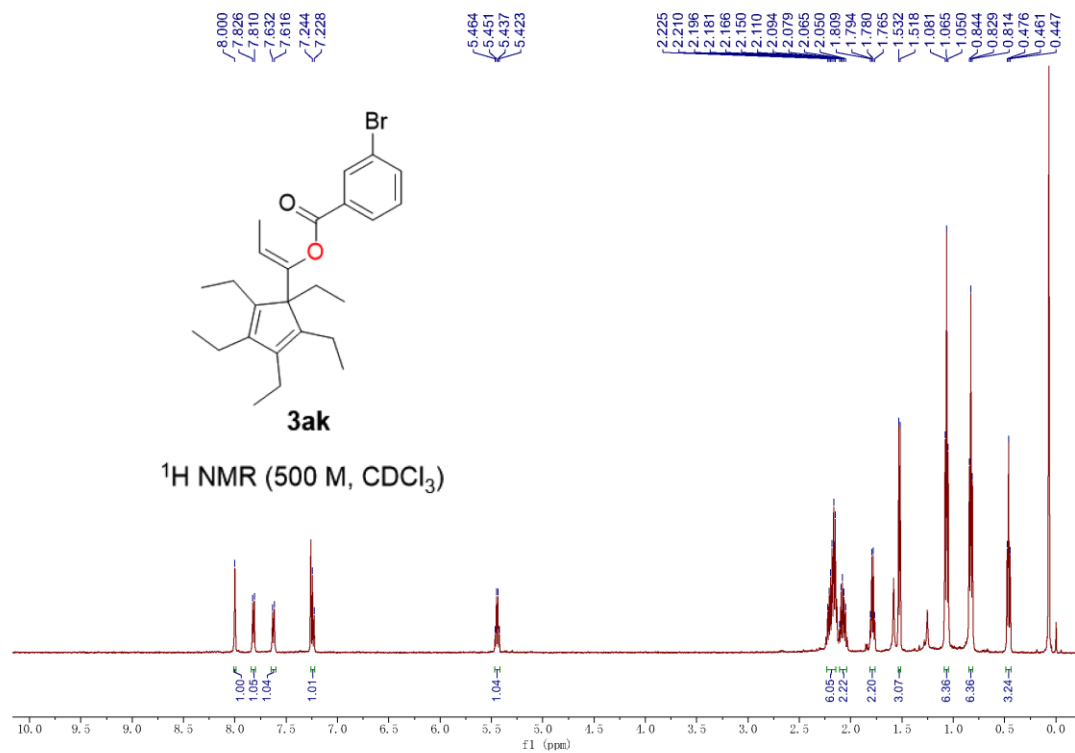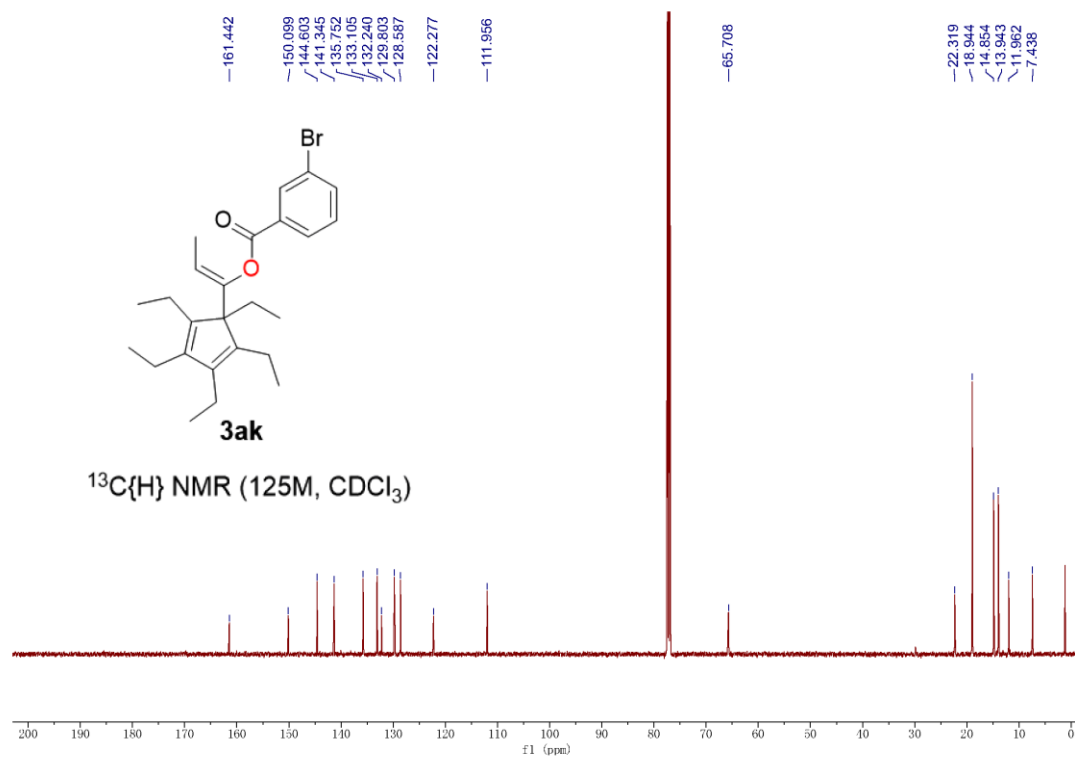

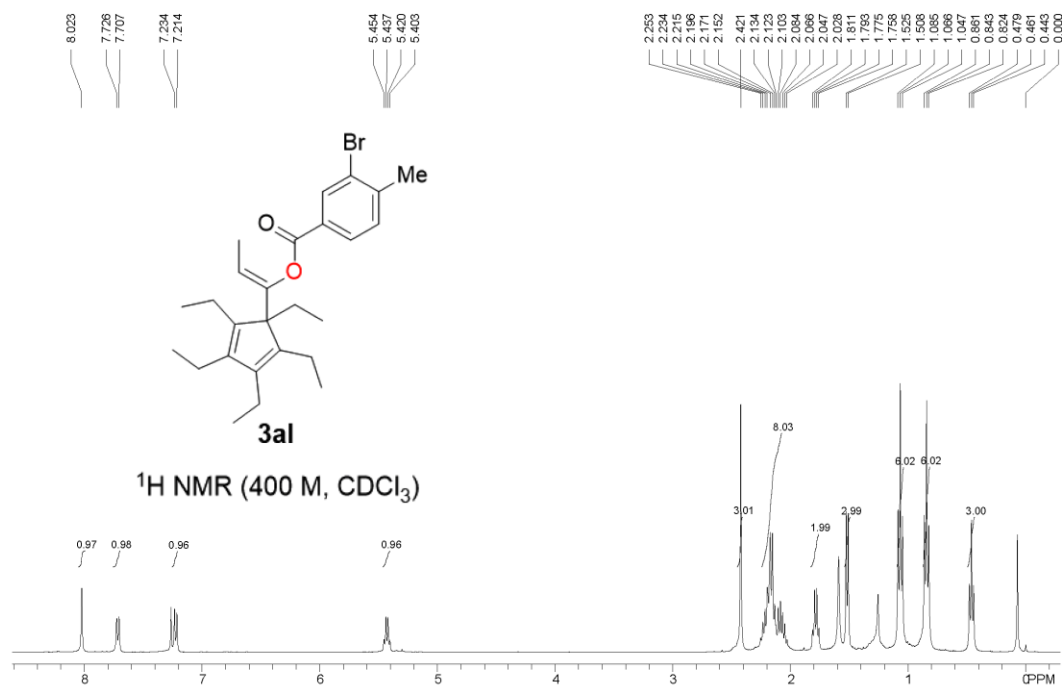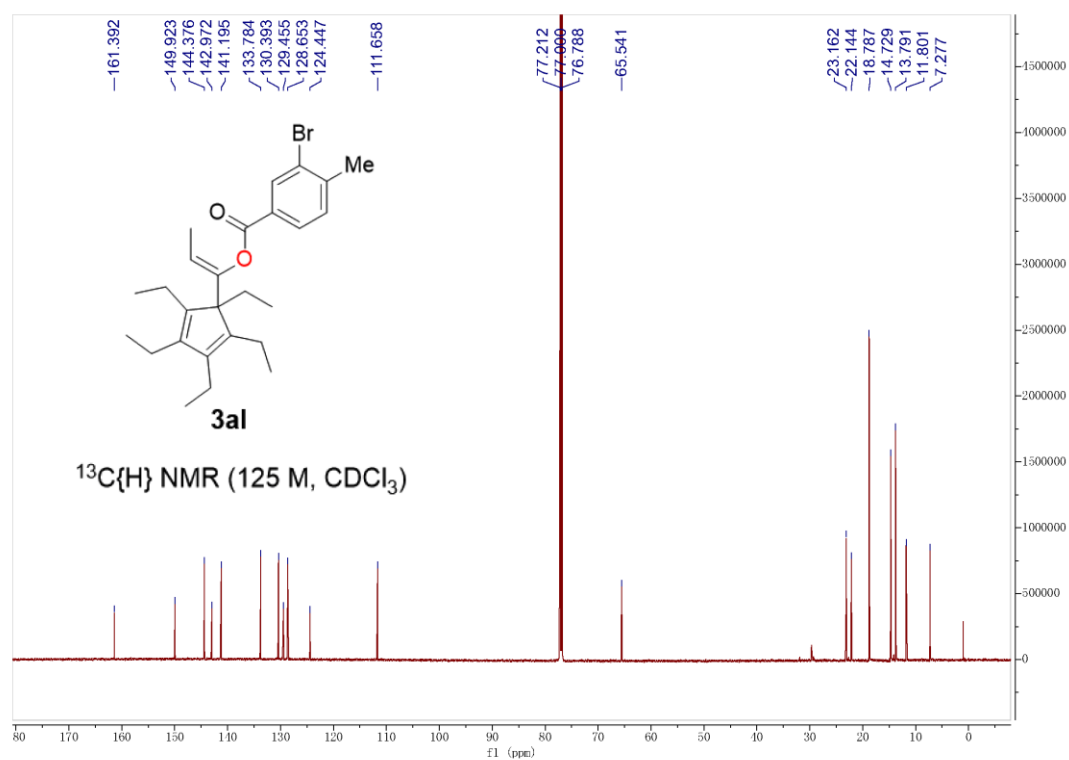

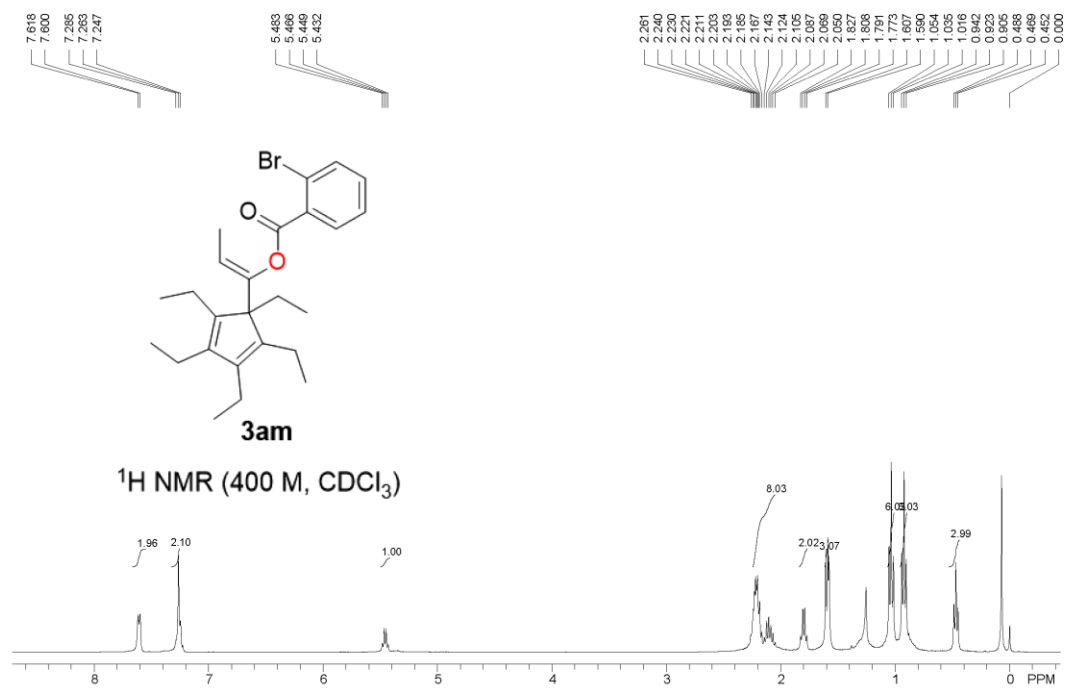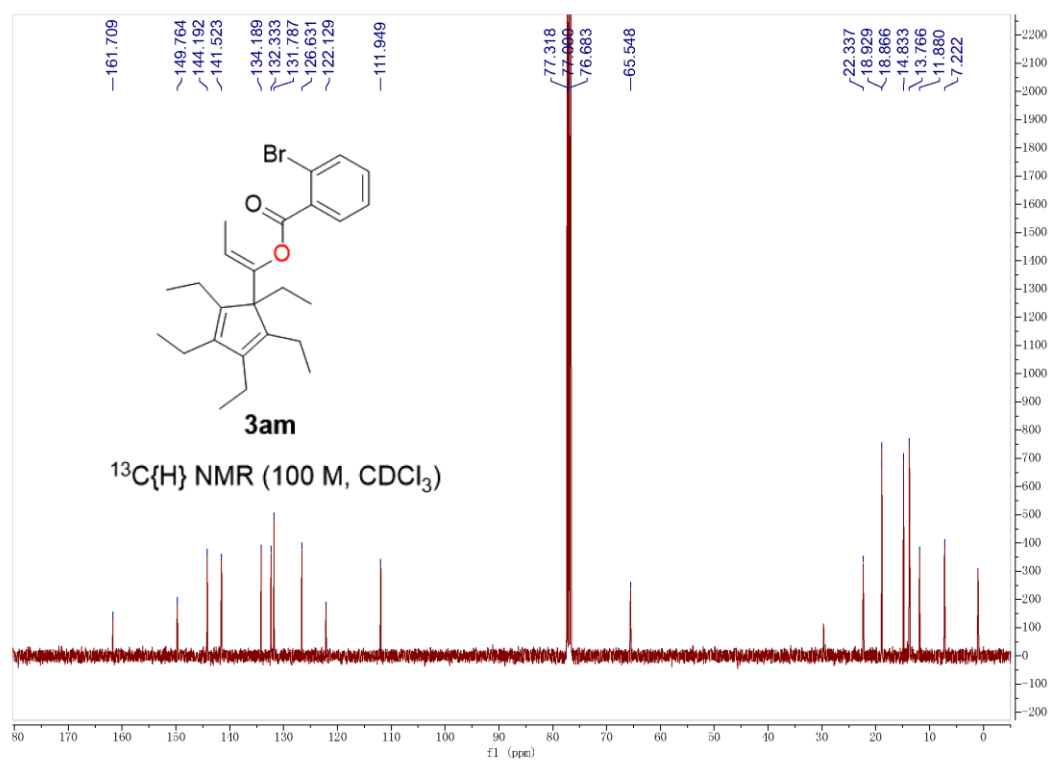

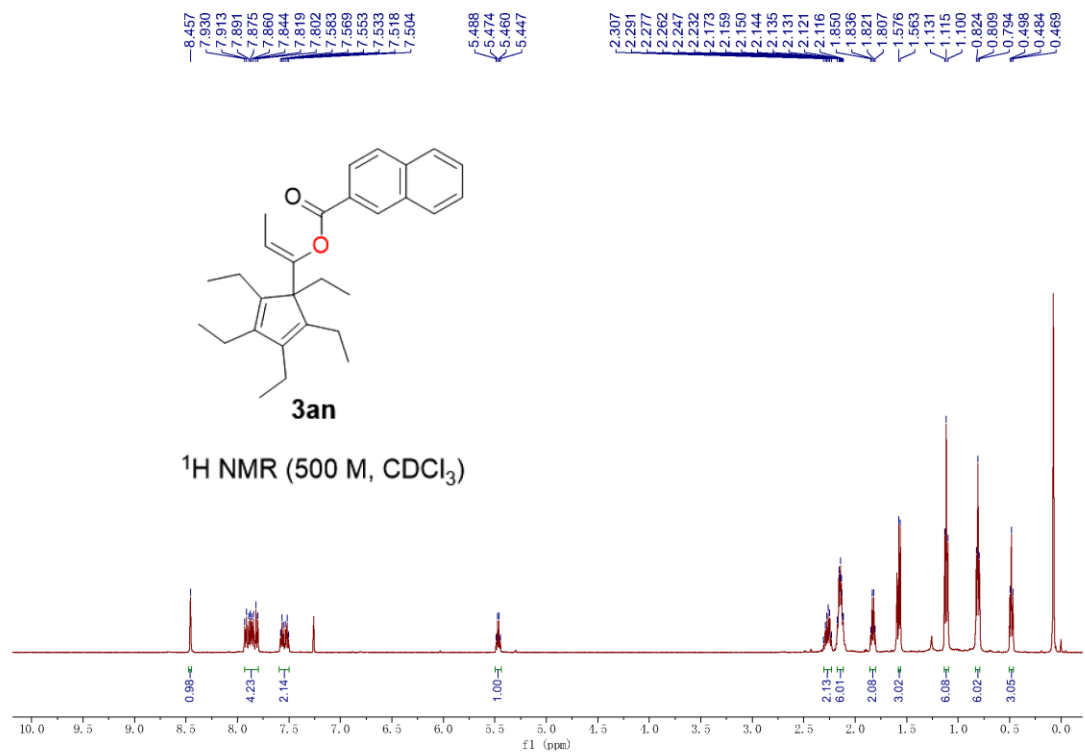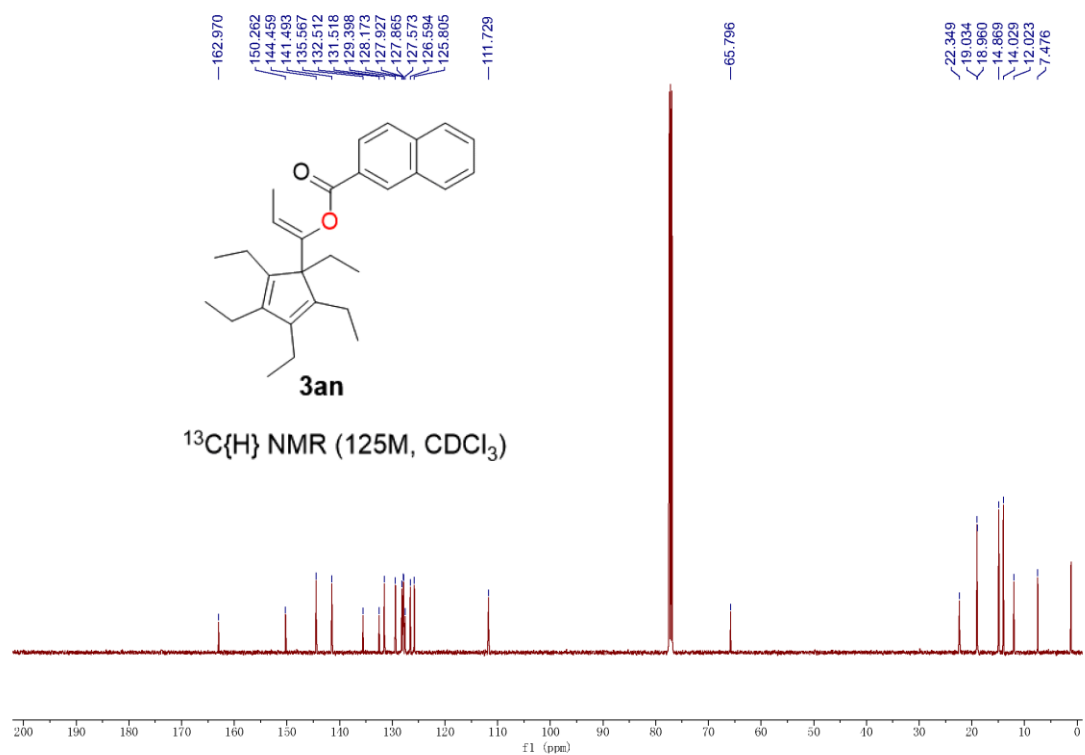

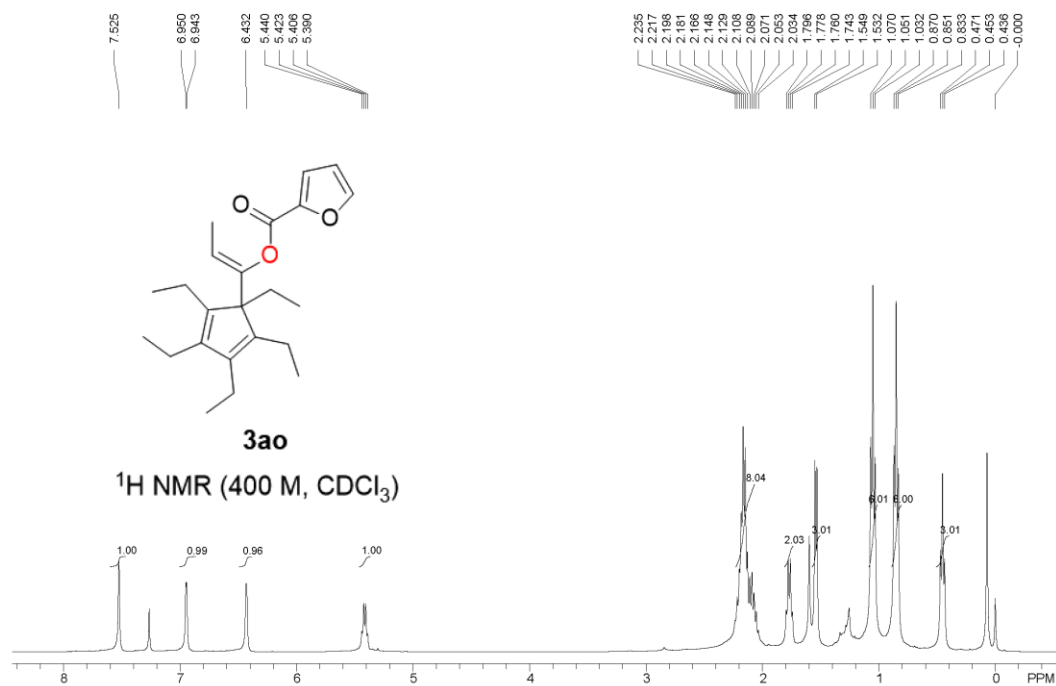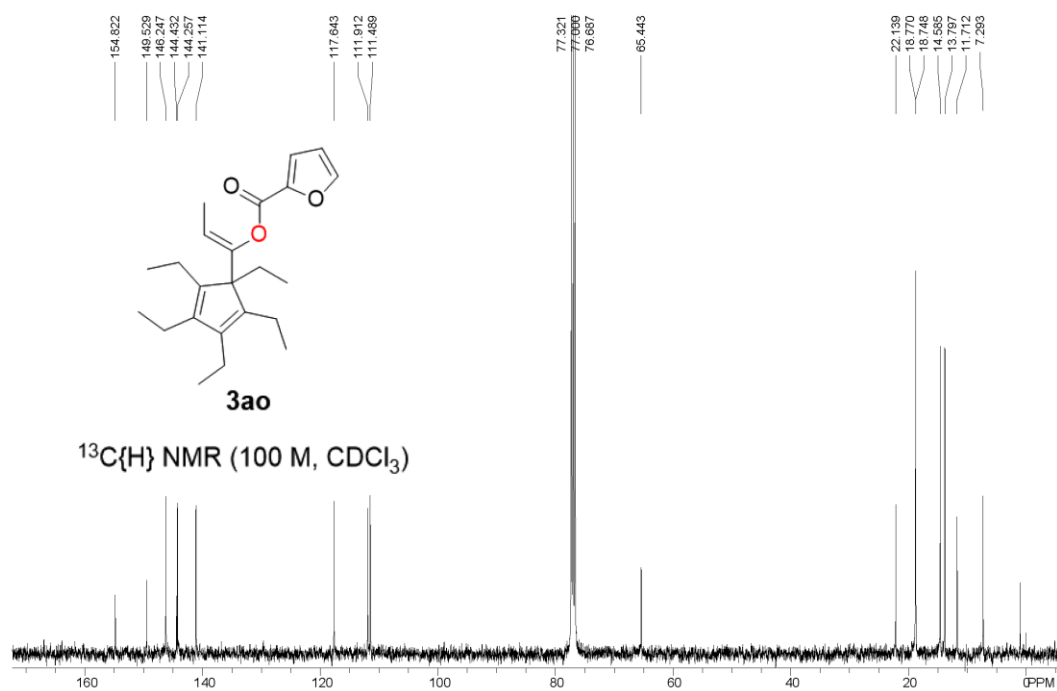

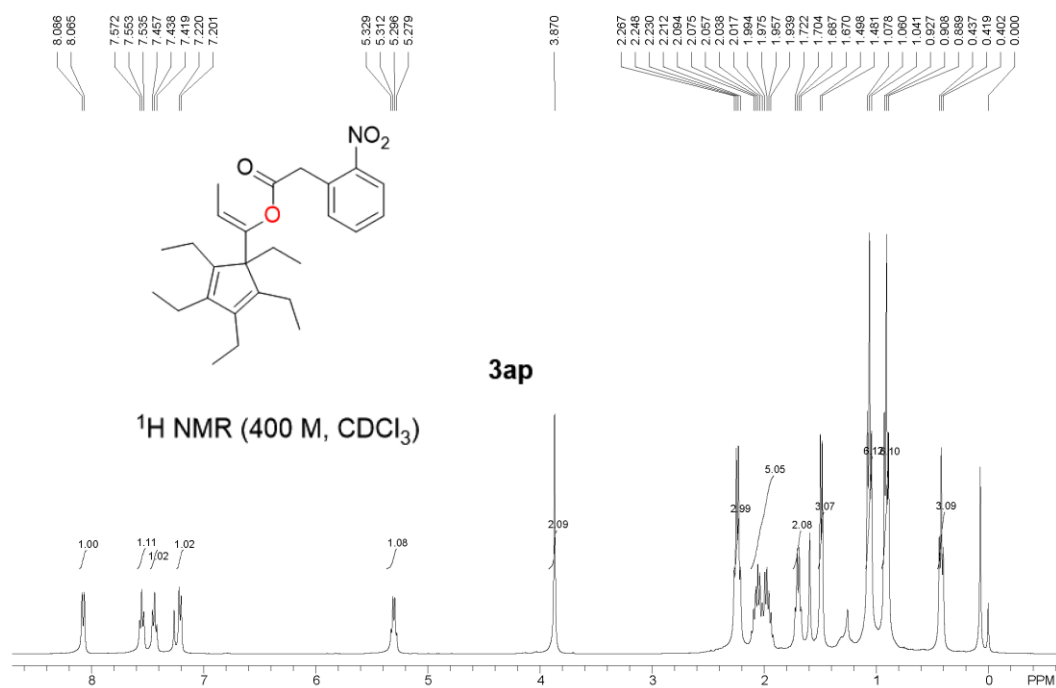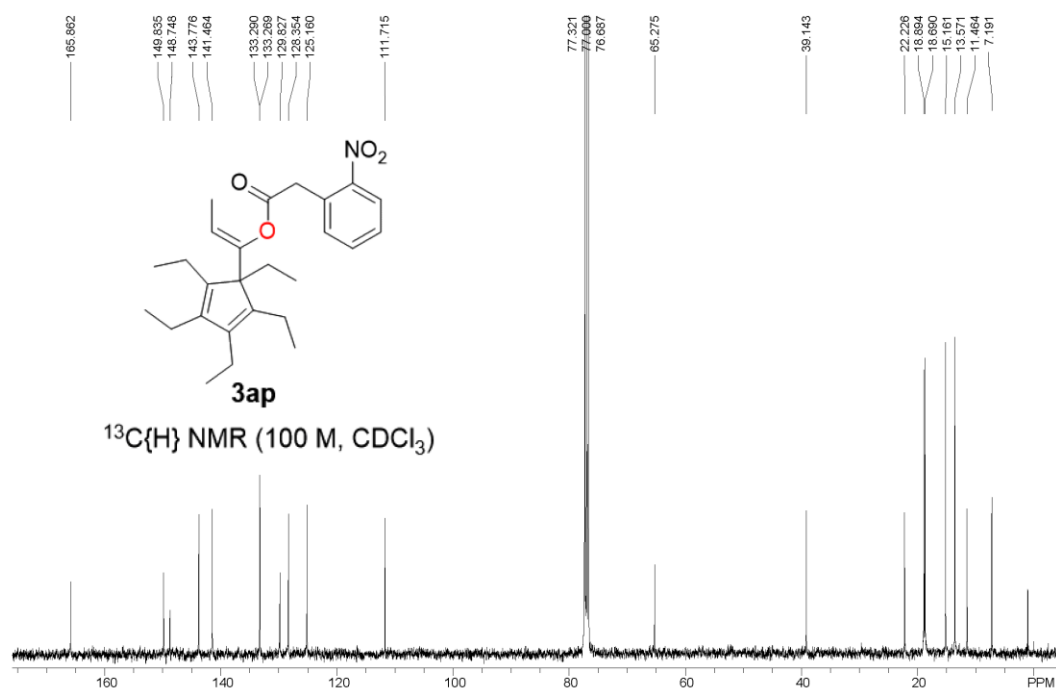

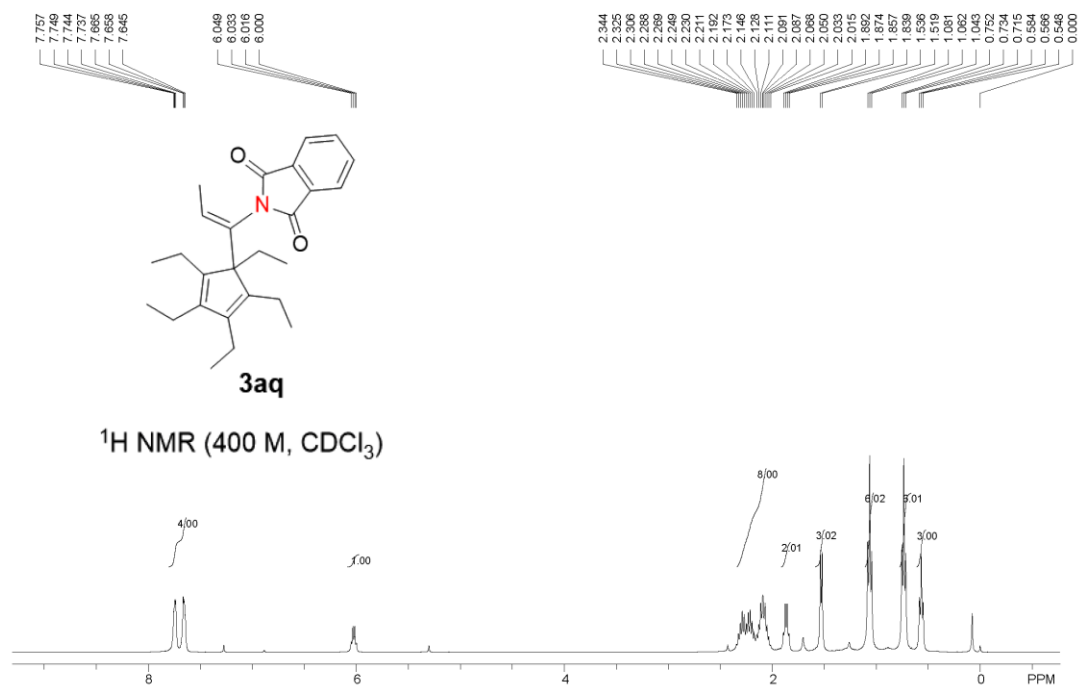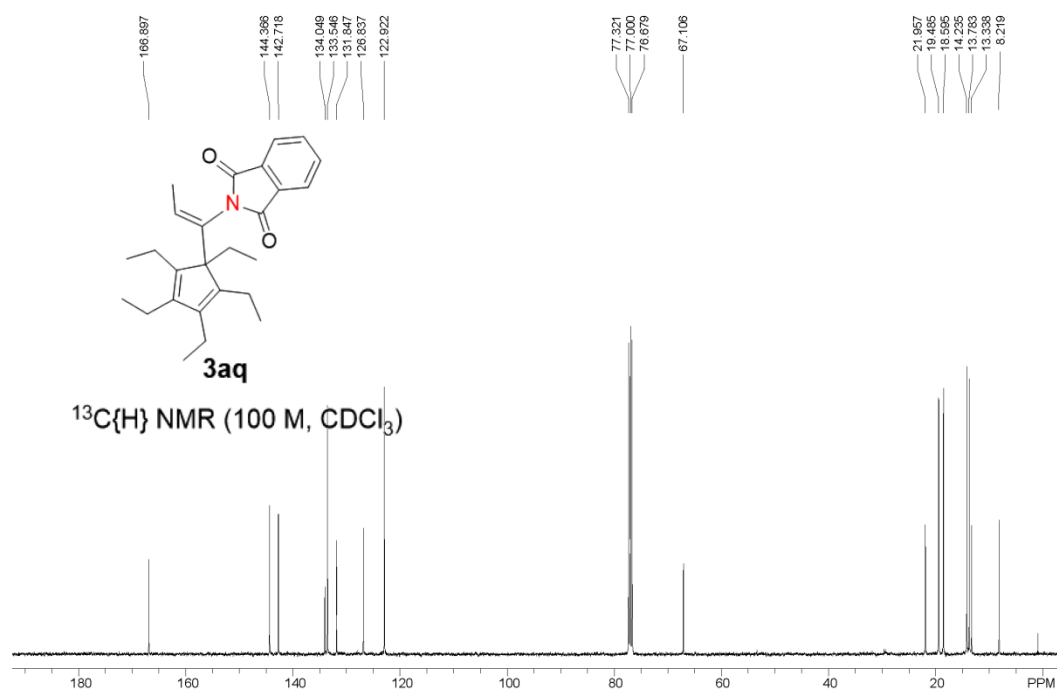

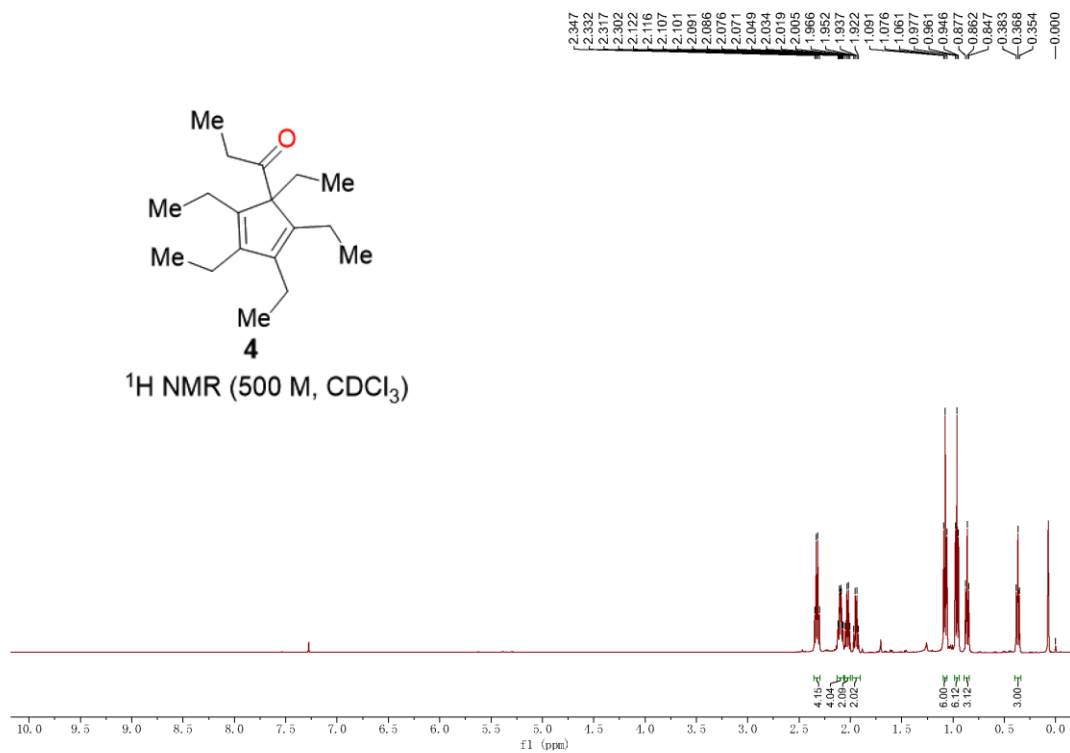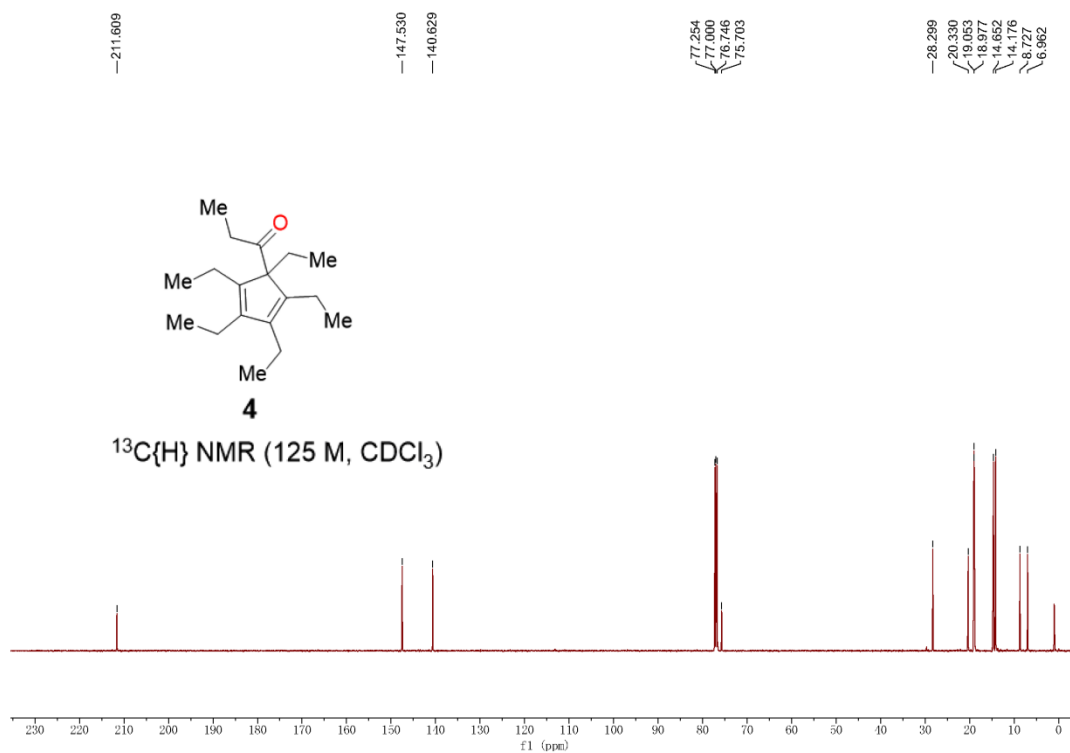



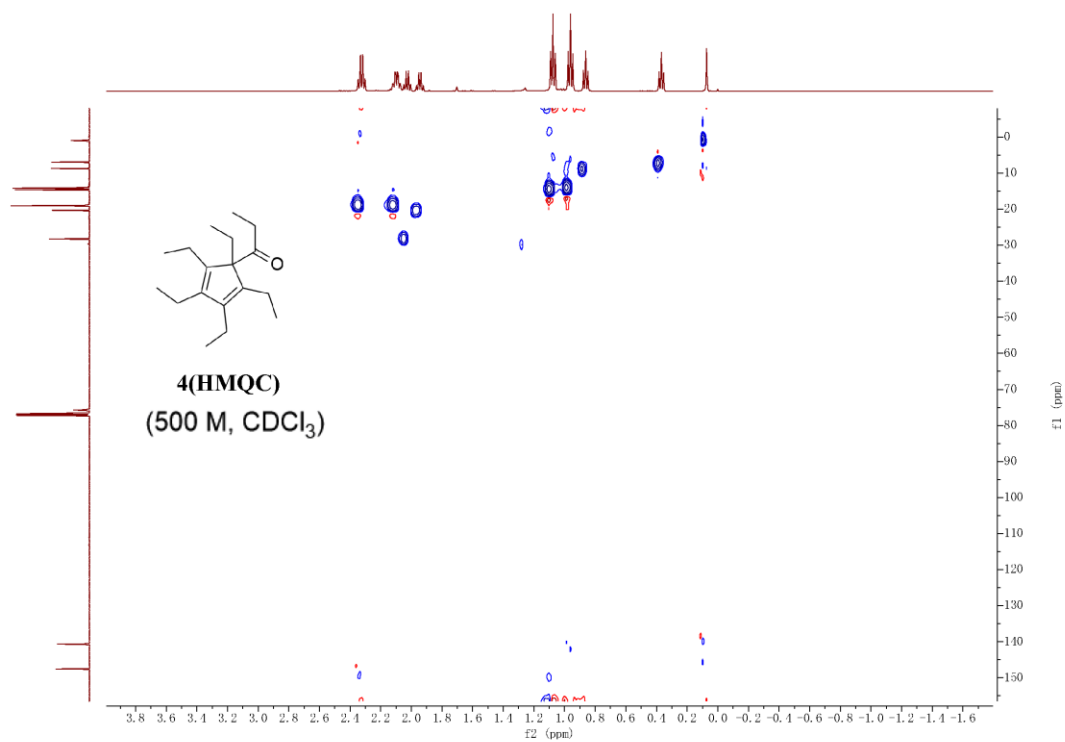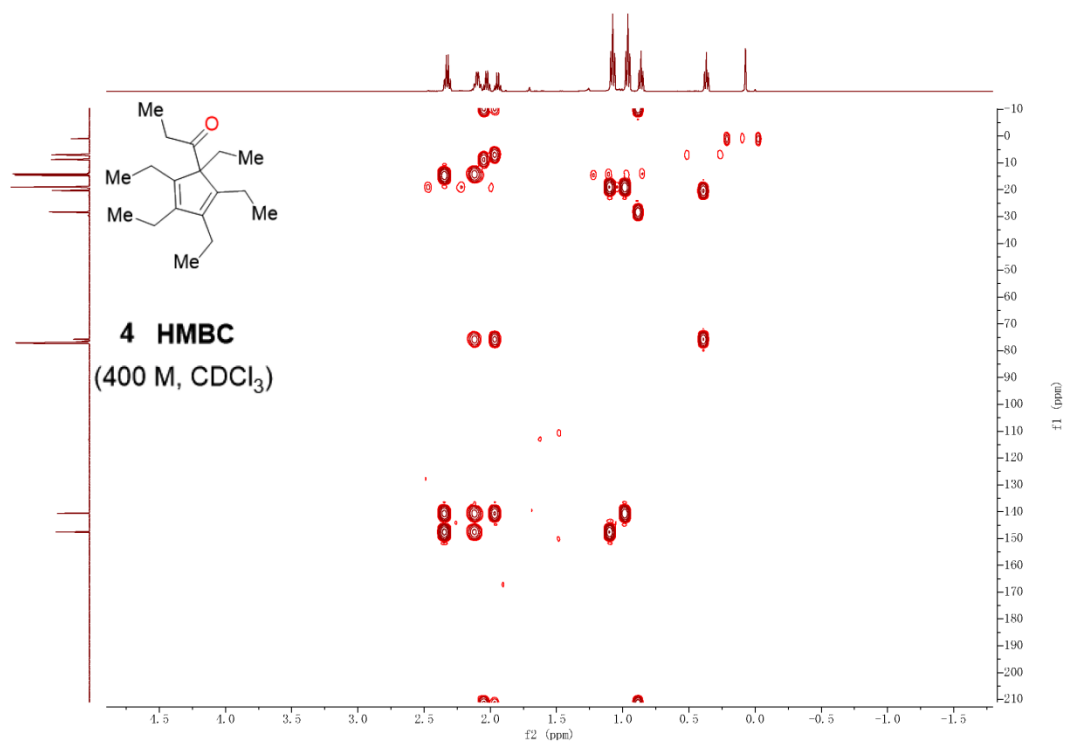

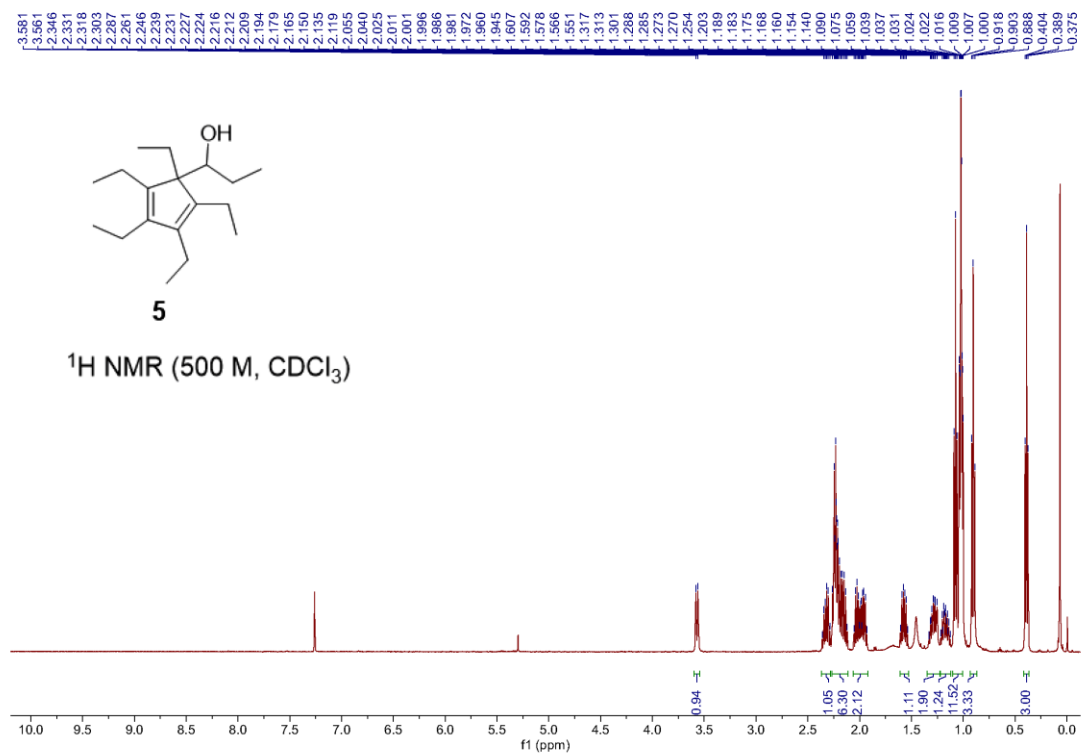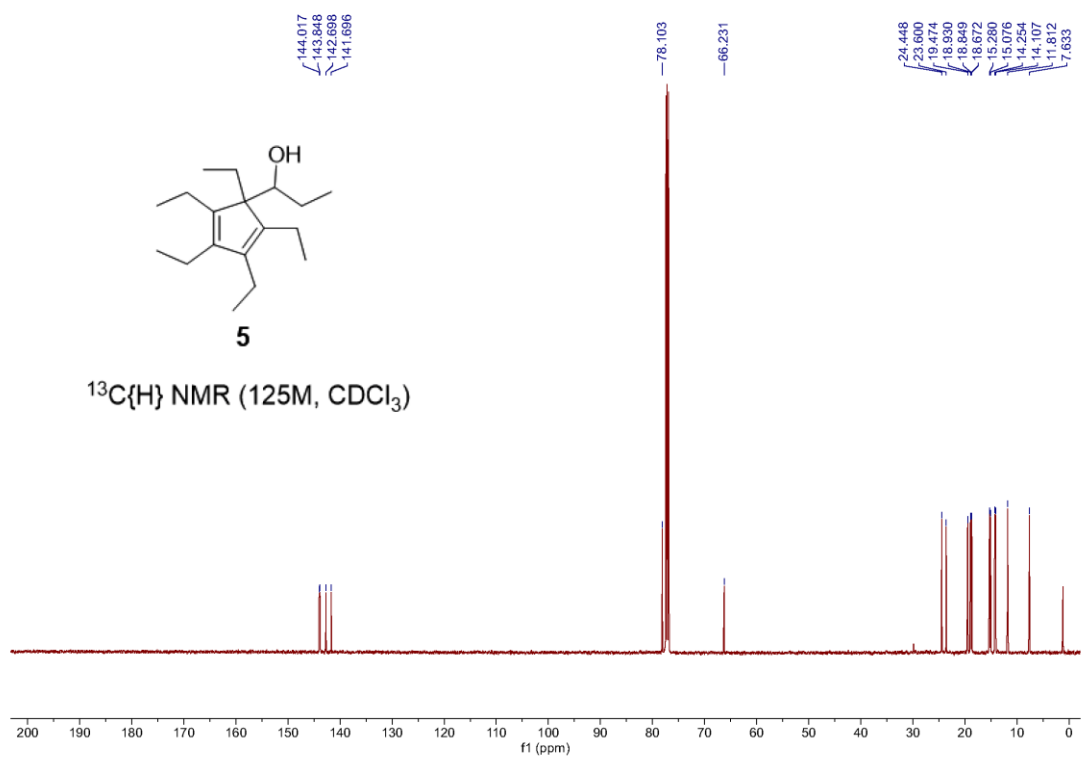

Supplement: d5qo01231g1.pdf [file d5qo01231g1.pdf]
